# Supplementary material for: First cycloruthenation of 2-alkenylpyridines: synthesis, characterization and properties
Source: Royal Society of Chemistry journal article supplement (doi:10.1039/d0ra09833g), 2021-01-01
Supplement: d0ra09833g1.pdf [file d0ra09833g1.pdf]

## Supporting Information

### First Cycloruthenation of 2-Alkenylpyridines: Synthesis, Characterization and Properties

Yuhao Wu <sup>a,§</sup>, Xianlong Su <sup>a,§</sup>, Chaoyi Xie <sup>a</sup>, Rongrong Hu <sup>b</sup>, Xianghong Li <sup>a,\*</sup>,  
Qiang Zhao <sup>b</sup>, Guoli Zheng <sup>a</sup>, Junkun Yan <sup>a</sup>

<sup>a</sup> Key Laboratory of Catalysis and Energy Materials Chemistry of Ministry of Education & Hubei Key Laboratory of Catalysis and Materials Science, South-Central University for Nationalities, Wuhan 430074, China.

<sup>b</sup> Key Laboratory for Organic Electronics & Information Displays(KLOEID) and Institute of Advanced Materials (IAM), Nanjing University of Posts & Telecommunications (NUPT), Nanjing 210023, China.

\*Corresponding author, Email: lixhchem@mail.scuec.edu.cn

§These authors contributed equally.

Table S1. Crystal data and structure refinement for **2**·2CH<sub>3</sub>OH.

|                                      |                                                                                       |                            |
|--------------------------------------|---------------------------------------------------------------------------------------|----------------------------|
| Empirical formula                    | C <sub>33</sub> H <sub>26</sub> F <sub>6</sub> N <sub>5</sub> PRu·2CH <sub>3</sub> OH |                            |
| Formula weight                       | 802.71                                                                                |                            |
| Temperature                          | 293(2) K                                                                              |                            |
| Wavelength                           | 0.71073 Å                                                                             |                            |
| Crystal system                       | triclinic                                                                             |                            |
| Space group                          | P-1                                                                                   |                            |
| Unit cell dimensions                 | $a = 7.5639(4)$ Å                                                                     | $\alpha = 99.165(3)^\circ$ |
|                                      | $b = 12.0236(5)$ Å                                                                    | $\beta = 93.603(3)^\circ$  |
|                                      | $c = 19.0129(9)$ Å                                                                    | $\gamma = 91.597(3)^\circ$ |
| Volume                               | 1702.43(14) Å <sup>3</sup>                                                            |                            |
| Z                                    | 2                                                                                     |                            |
| Density (calculated)                 | 1.566 Mg/m <sup>3</sup>                                                               |                            |
| Absorption coefficient               | 0.581 mm <sup>-1</sup>                                                                |                            |
| F(000)                               | 816.0                                                                                 |                            |
| 2 $\theta$ range for data collection | 3.434 to 49.992                                                                       |                            |
| Index ranges                         | $-8 \leq h \leq 8$ , $-14 \leq k \leq 14$ , $-22 \leq l \leq 22$                      |                            |
| Reflections collected                | 29410                                                                                 |                            |
| Independent reflections              | 29410 [ $R_{\text{int}} = -$ , $R_{\text{sigma}} = 0.0866$ ]                          |                            |
| Refinement method                    | Full-matrix least-squares on F <sup>2</sup>                                           |                            |
| Data / restraints / parameters       | 29410/0/416                                                                           |                            |
| Goodness-of-fit on F <sup>2</sup>    | 1.090                                                                                 |                            |
| Final R indices [ $I > 2\sigma(I)$ ] | $R_1 = 0.0671$ , $wR_2 = 0.1864$                                                      |                            |
| R indices (all data)                 | $R_1 = 0.0889$ , $wR_2 = 0.2026$                                                      |                            |
| Largest diff. peak and hole          | 0.857/-0.770 eÅ <sup>-3</sup>                                                         |                            |

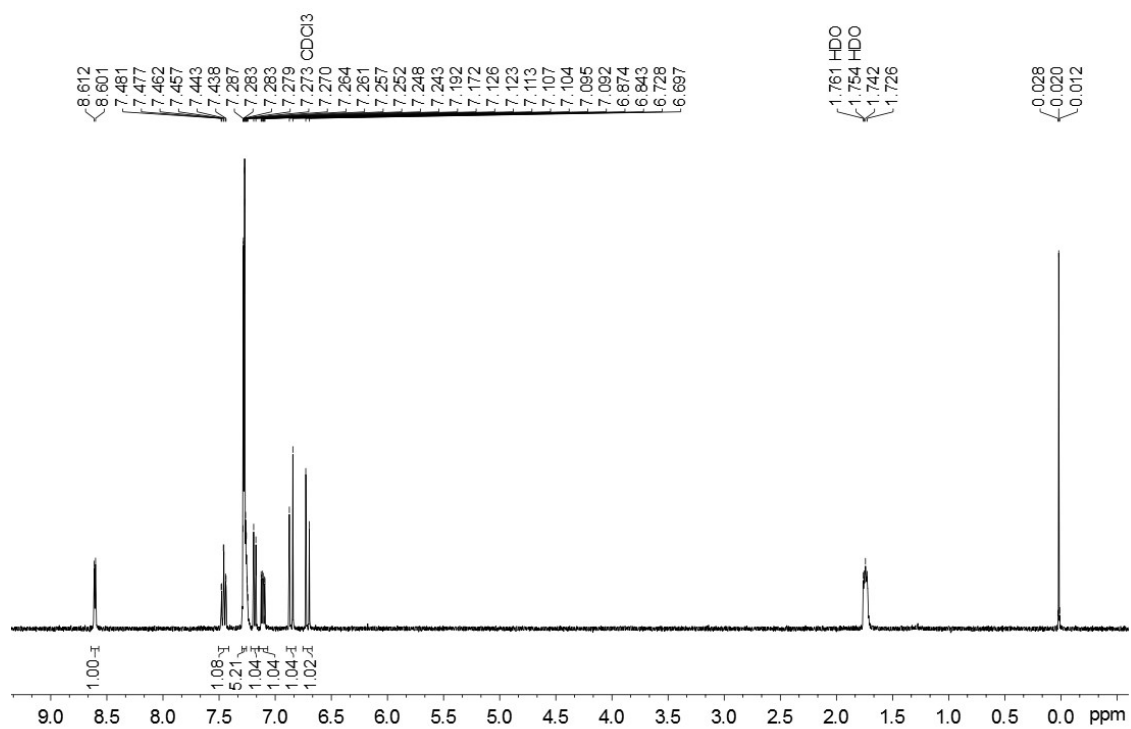

Fig. S1 <sup>1</sup>H NMR spectrum of (E)-2-styrylpyridine in CDCl<sub>3</sub>.

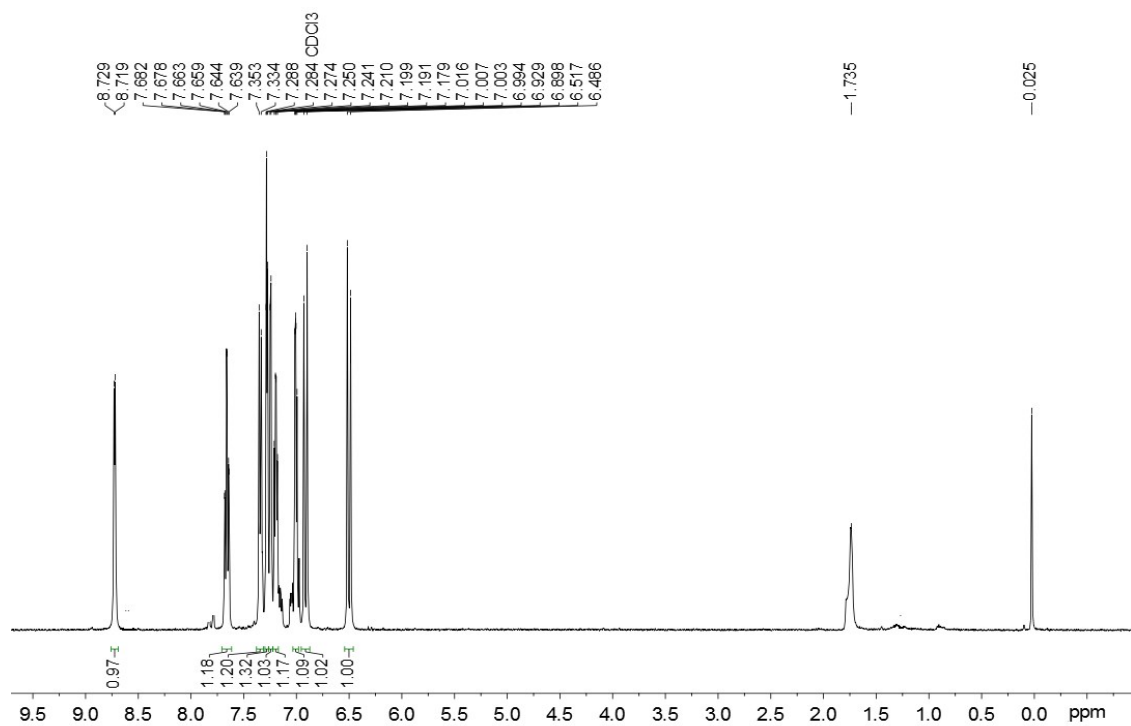

Fig. S2 <sup>1</sup>H NMR spectrum of (E)-2-(2-(thiophen-2-yl)vinyl)pyridine in CDCl<sub>3</sub>.

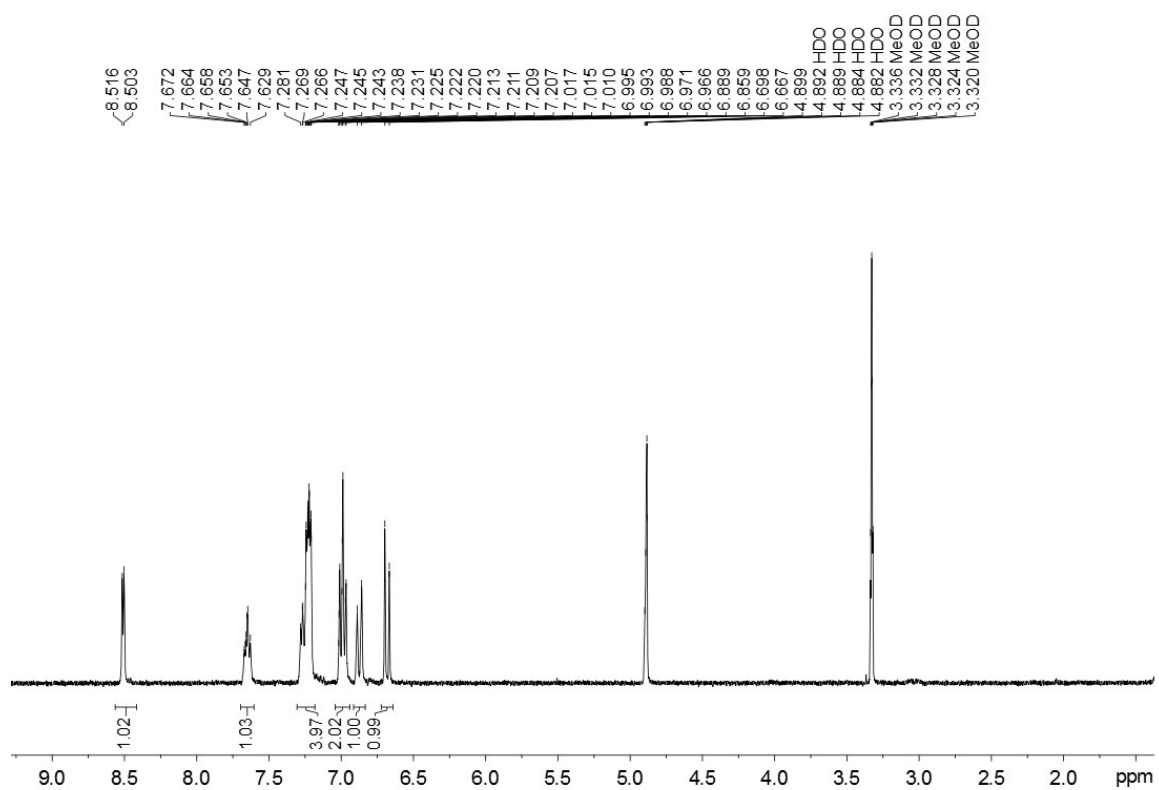

Fig. S3 <sup>1</sup>H NMR spectrum of (E)-2-(4-fluorostyryl)pyridine in CD<sub>3</sub>OD.

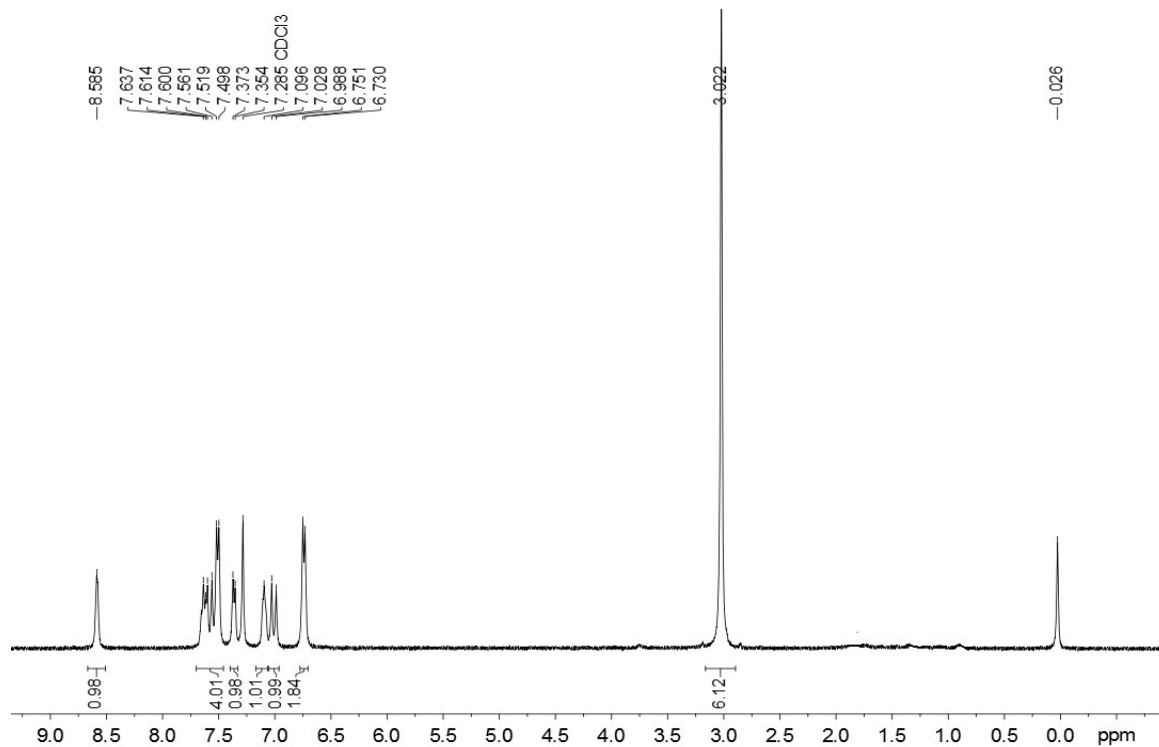

Fig. S4 <sup>1</sup>H NMR spectrum of (E)-N,N-dimethyl-4-(2-(pyridin-2-yl)vinyl)aniline in CDCl<sub>3</sub>.

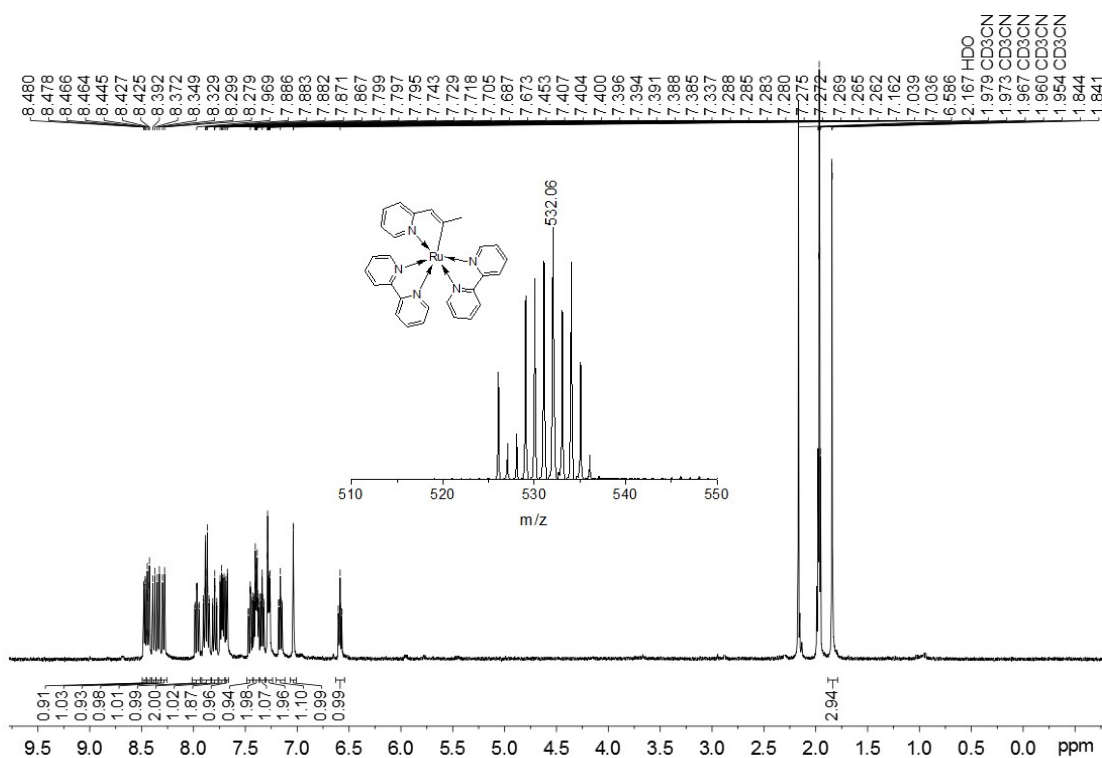

Fig. S5 <sup>1</sup>H NMR spectrum of complex **1** in CD<sub>3</sub>CN. Inset: The MS spectrum of complex **1**.

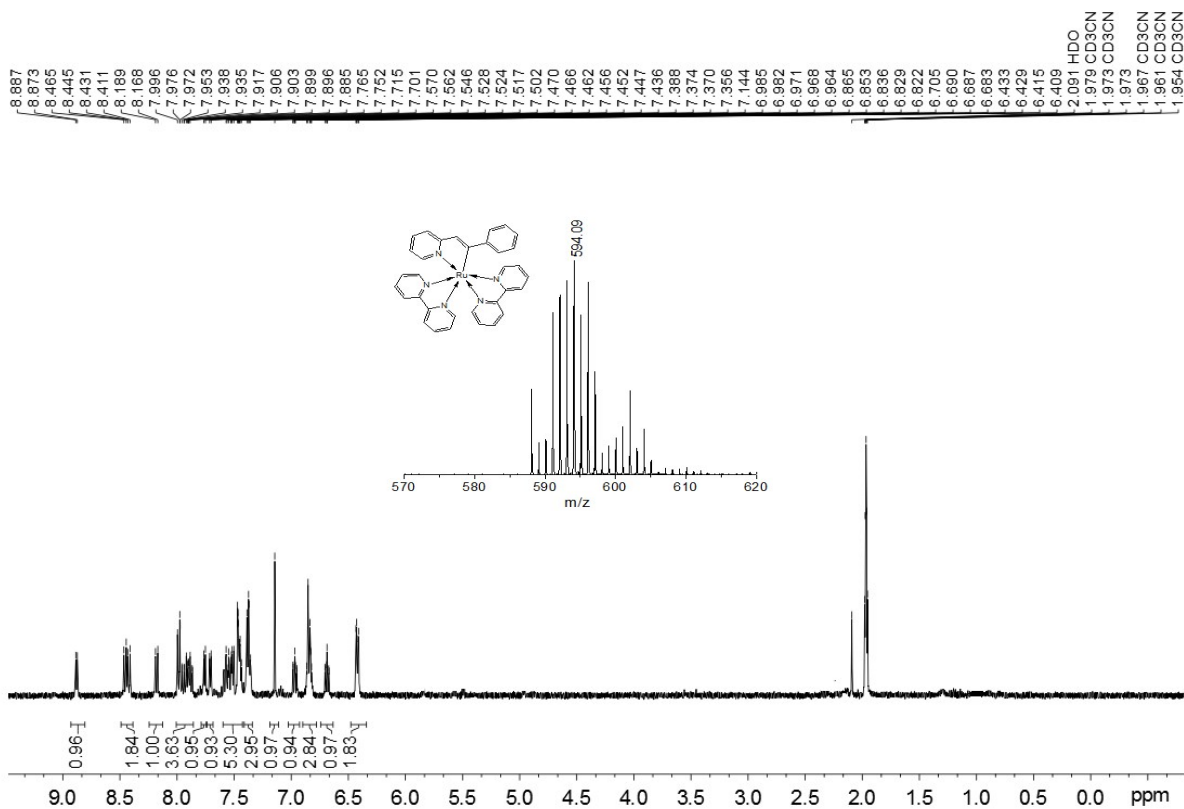

Fig. S6 <sup>1</sup>H NMR spectrum of complex **2** in CD<sub>3</sub>CN. Inset: The MS spectrum of complex **2**.

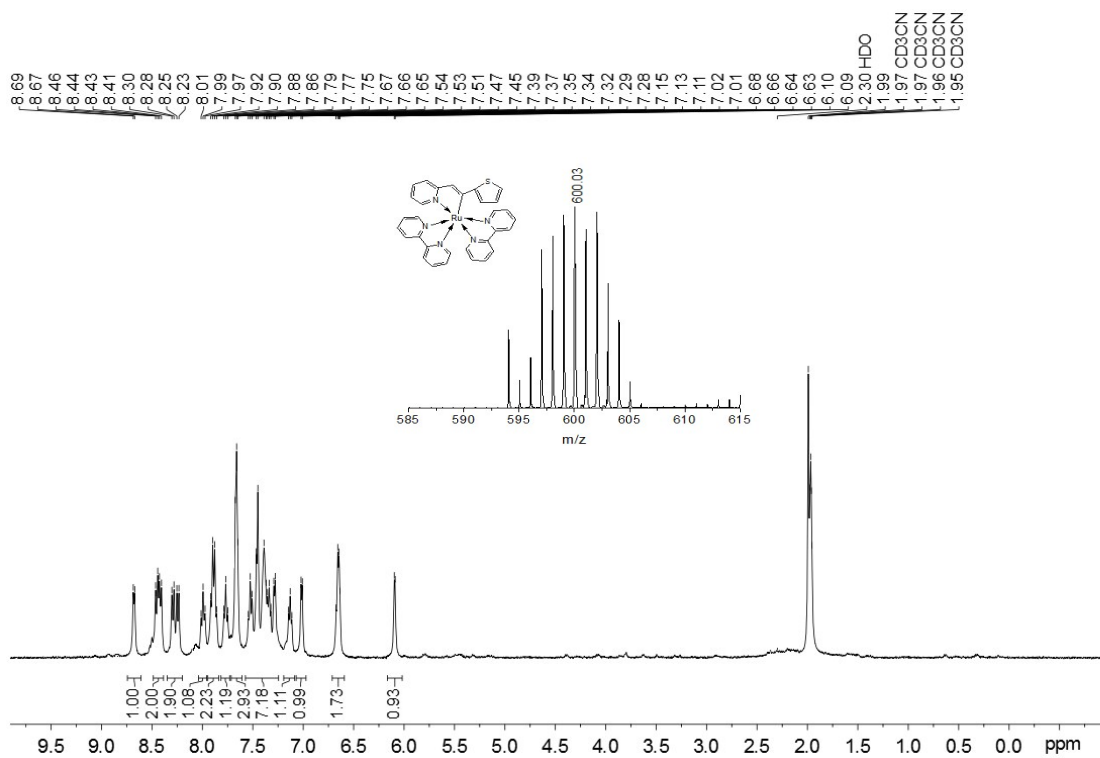

Fig. S7 <sup>1</sup>HNMR spectrum of complex **3** in CD<sub>3</sub>CN. Inset: The MS spectrum of complex **3**.

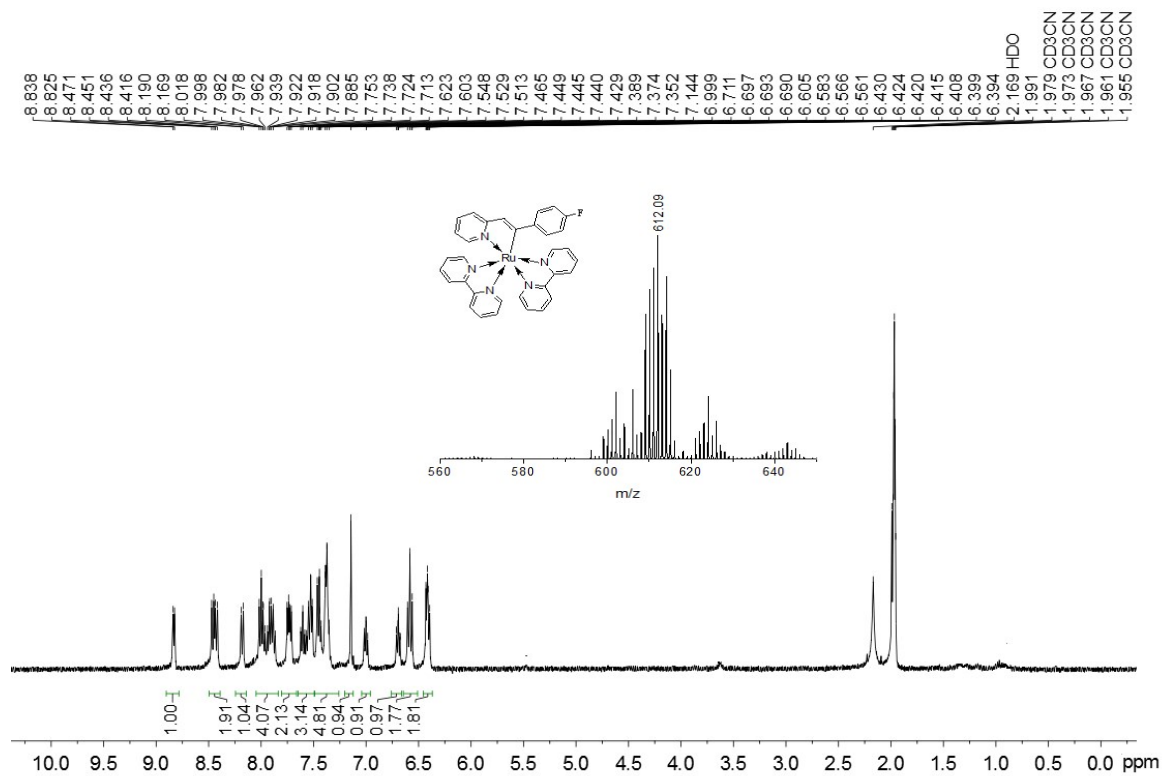

Fig. S8 <sup>1</sup>HNMR spectrum of complex **4** in CD<sub>3</sub>CN. Inset: The MS spectrum of complex **4**.

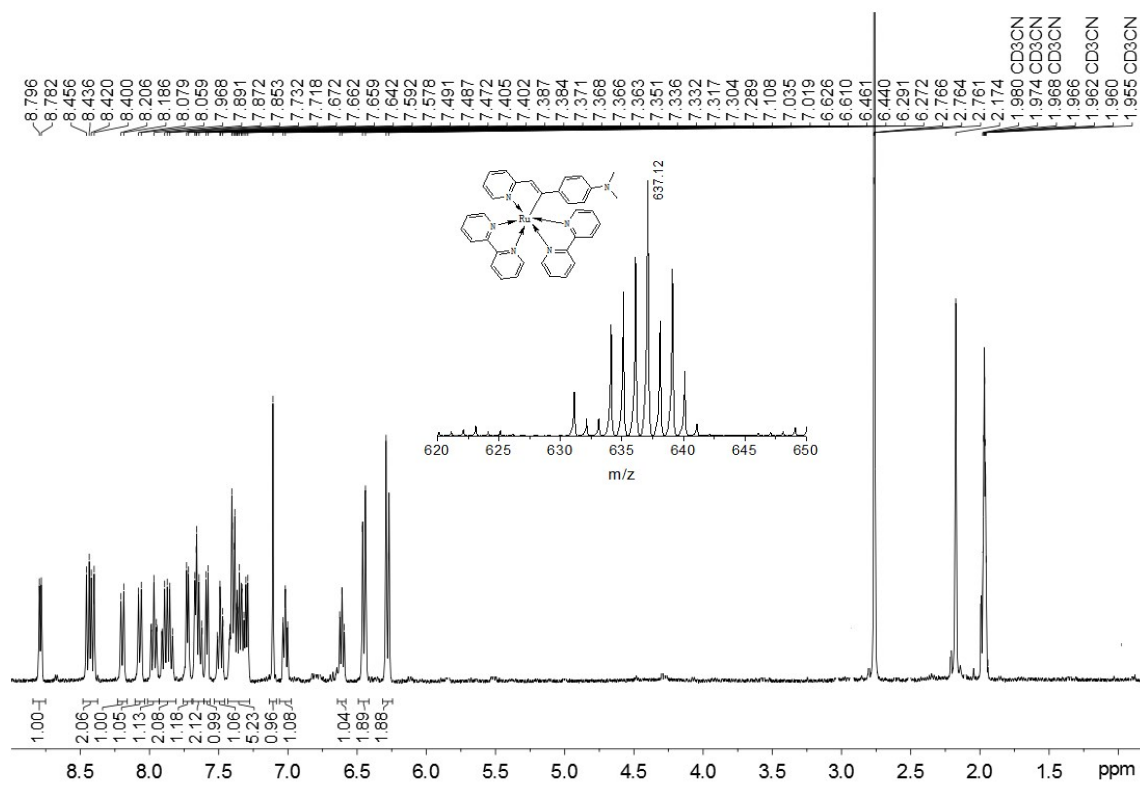

Fig. S9 <sup>1</sup>H NMR spectrum of complex 5 in CD<sub>3</sub>CN. Inset: The MS spectrum of complex 5.

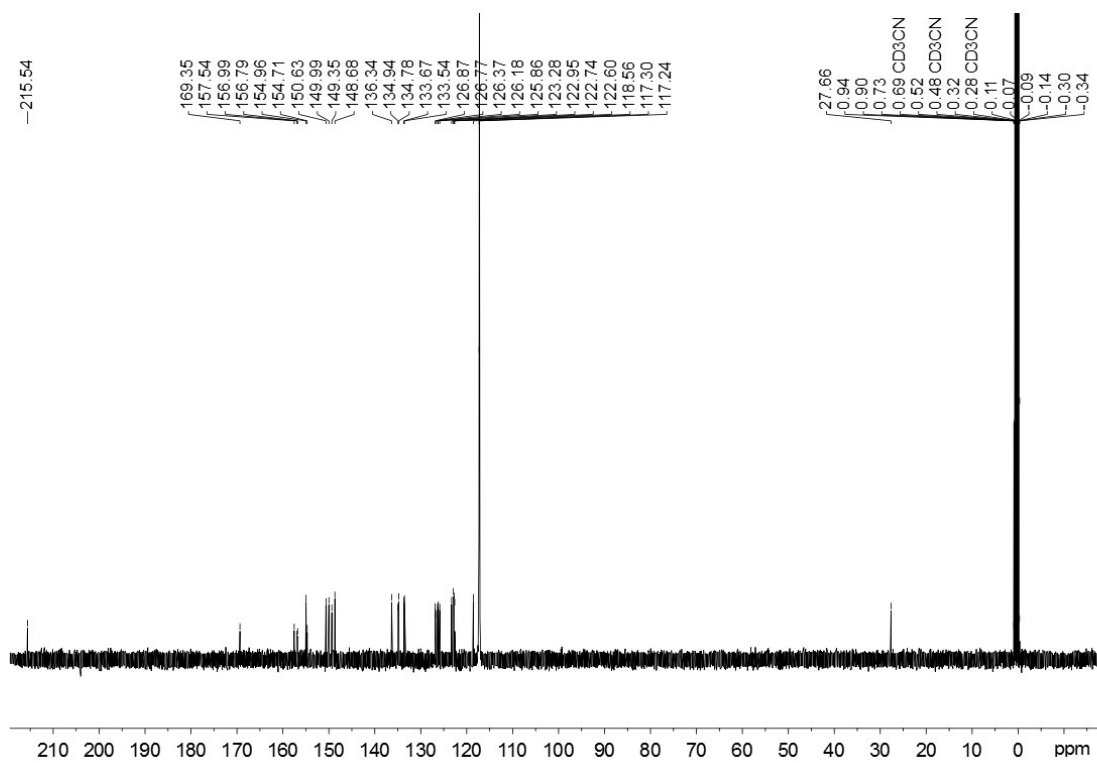

Fig. S10 <sup>13</sup>C NMR spectrum of complex 1 in CD<sub>3</sub>CN.

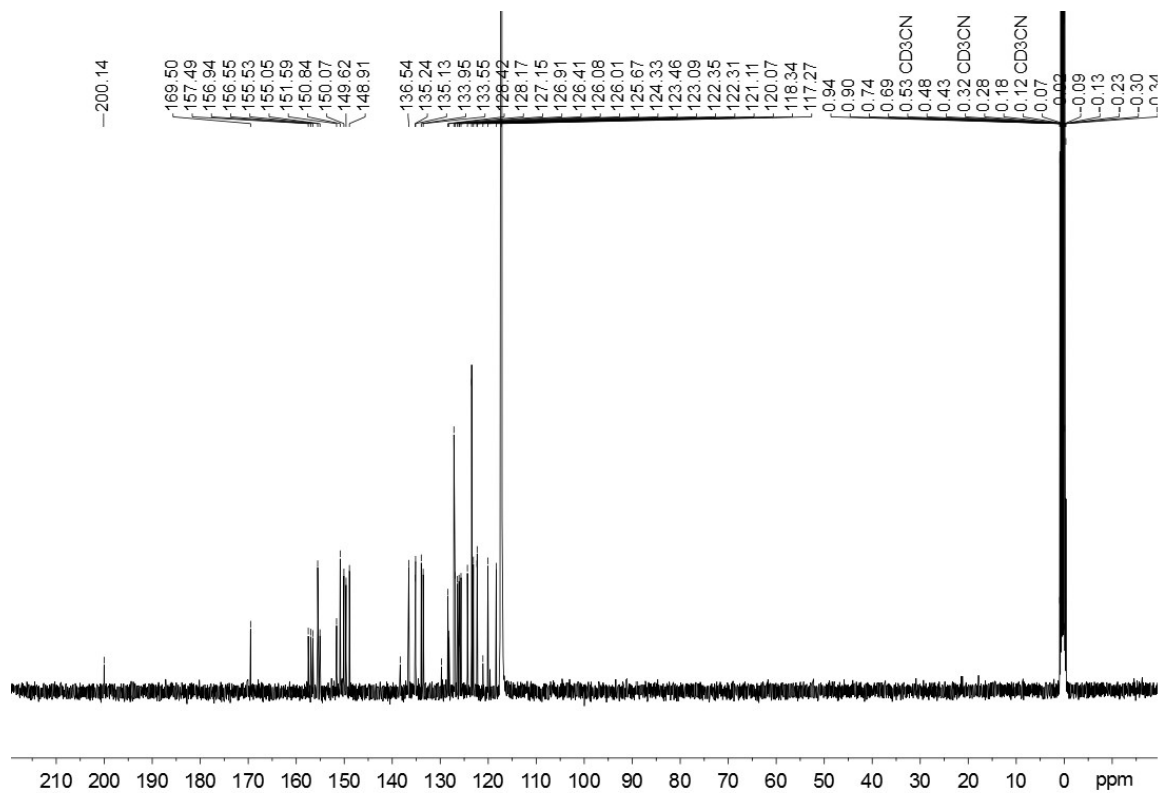

Fig. S11  $^{13}\text{C}$  NMR spectrum of complex **2** in  $\text{CD}_3\text{CN}$ .

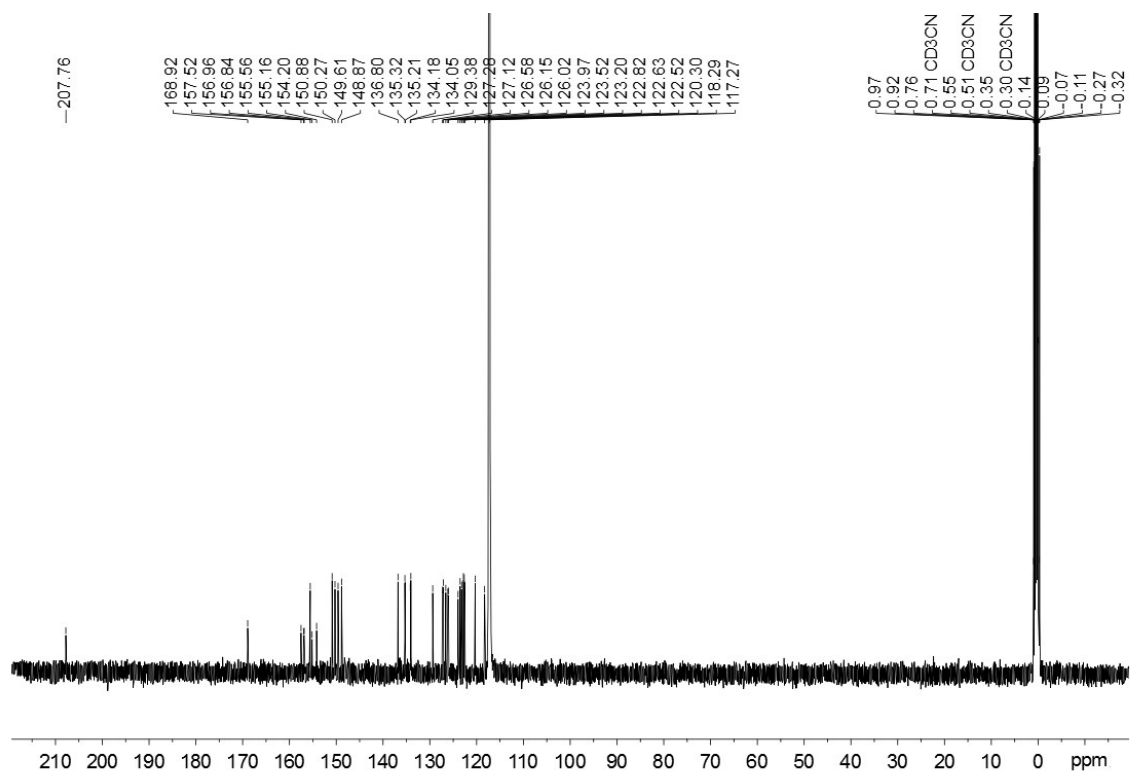

Fig. S12  $^{13}\text{C}$  NMR spectrum of complex **3** in  $\text{CD}_3\text{CN}$ .



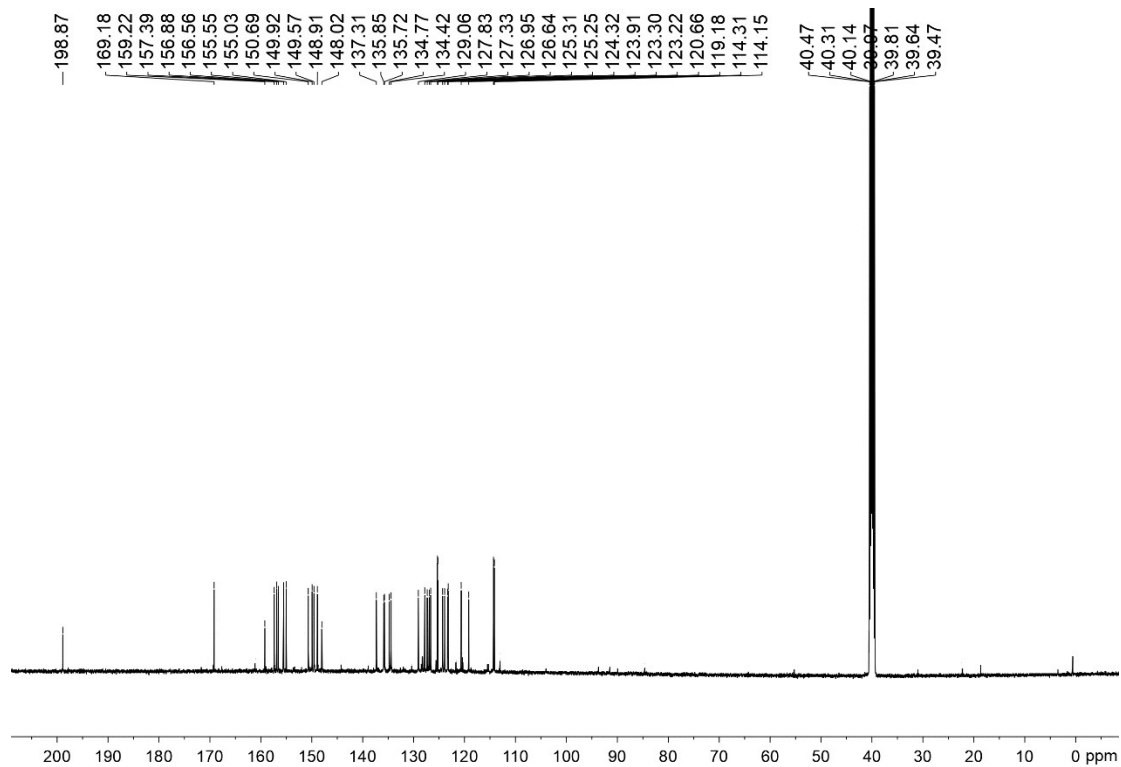

Fig. S13  $^{13}\text{C}$  NMR spectrum of complex **4** in  $d_6$ -DMSO.

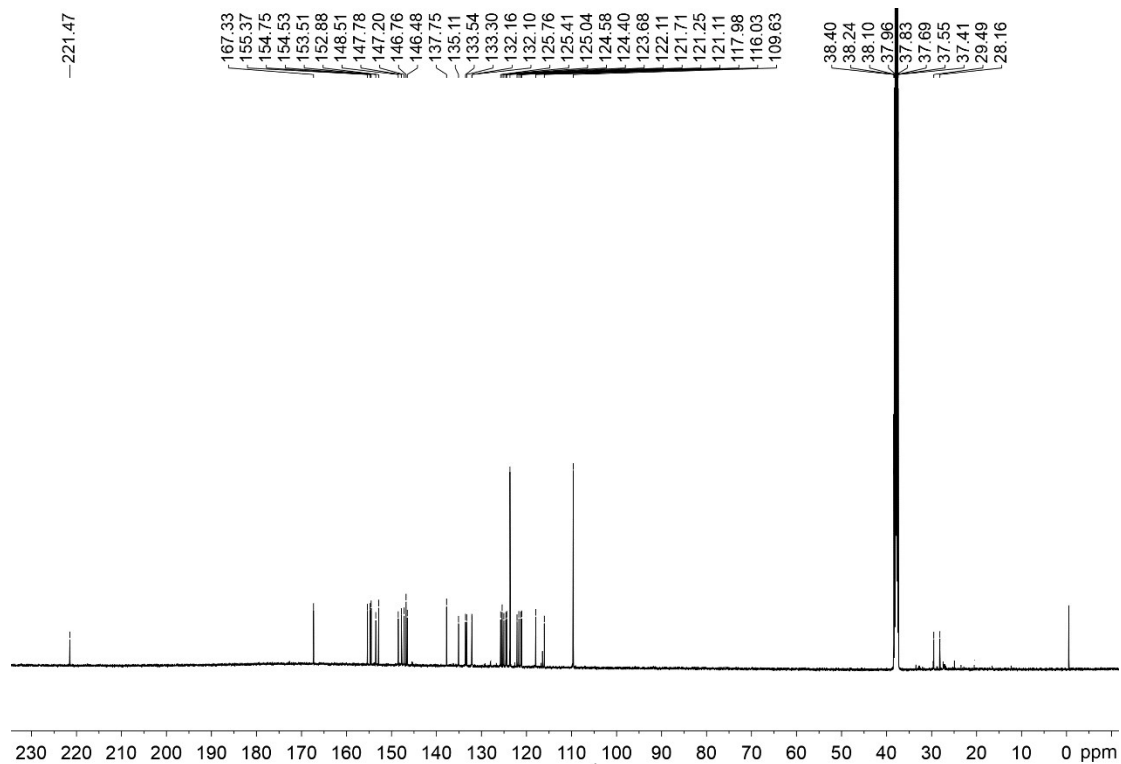

Fig. S14  $^{13}\text{C}$  NMR spectrum of complex **5** in  $d_6$ -DMSO.

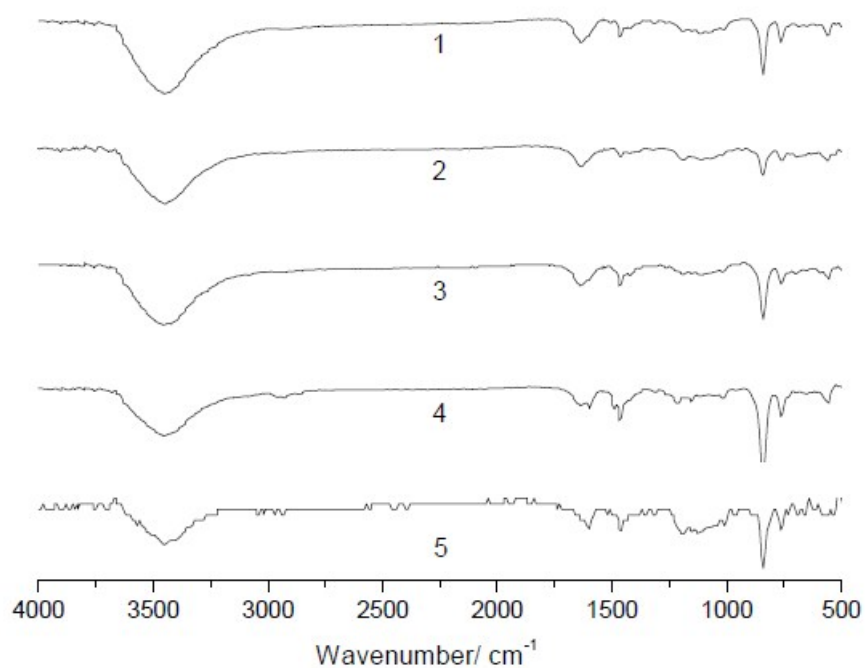

Fig. S15 FT-IR spectra of complexes **1–5** in KBr pellets.

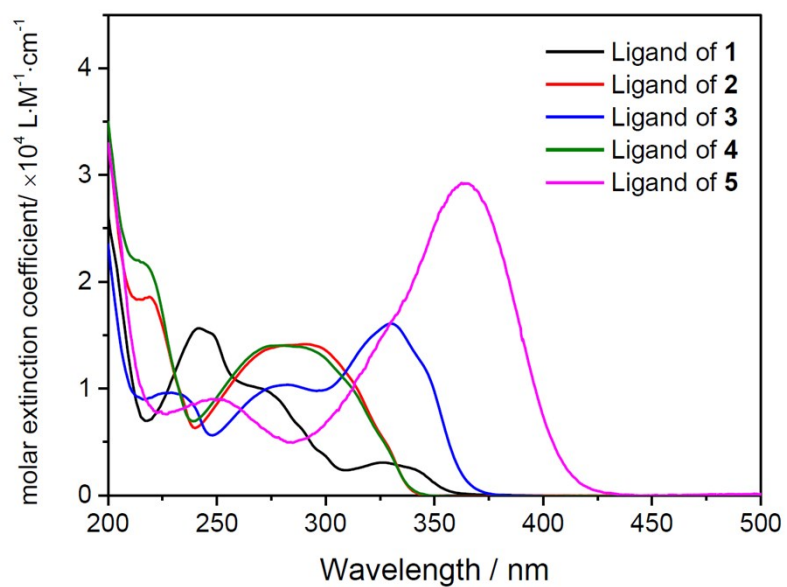

Fig. S16 Absorption spectra of 2-alkenylpyridine ligands (20  $\mu\text{M}$ ) of complexes **1–5** in  $\text{CH}_3\text{CN}$ .

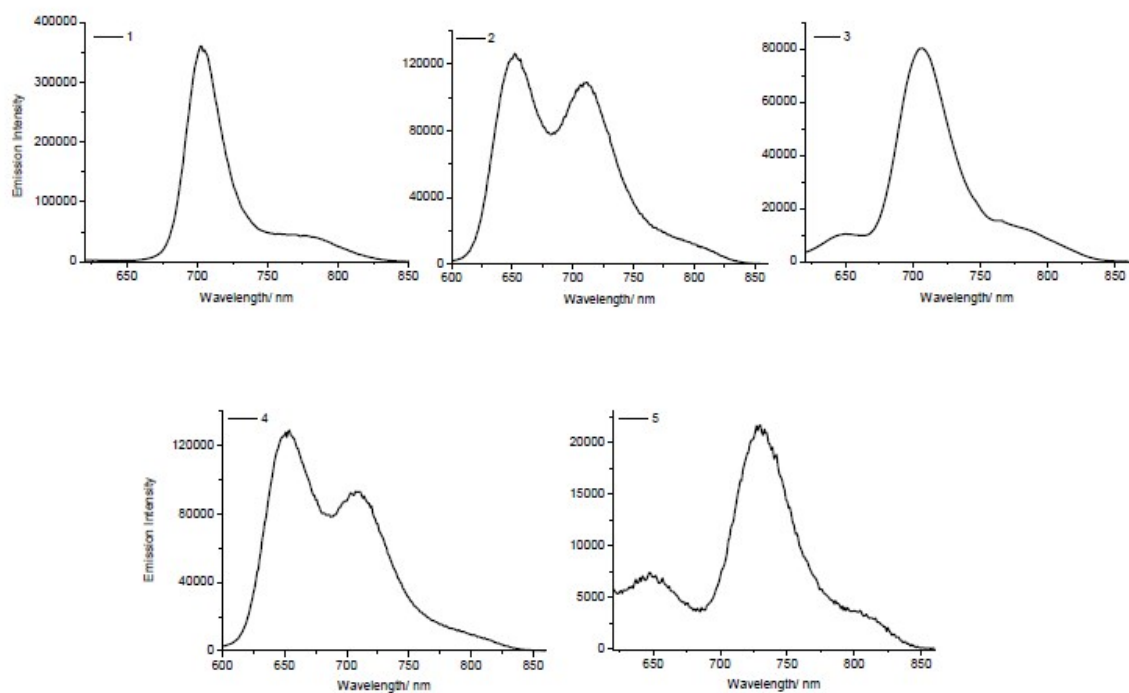

Fig. S17 Emission spectra of complexes **1–5** in 2-methyltetrahydrofuran glasses at 77 K ( $\lambda_{\text{ex}} = 500$  nm).

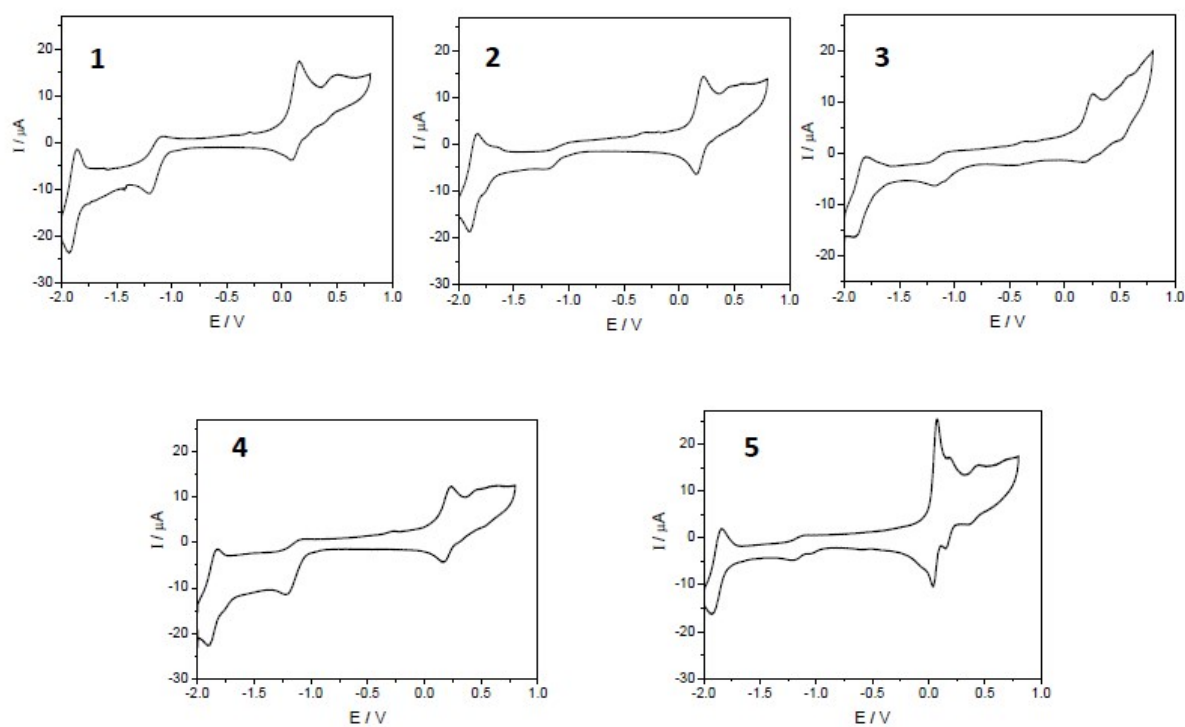

Fig. S18 Cyclic voltammetric responses for complexes **1–5** ( $1 \times 10^{-4}$  M) dissolved in acetonitrile containing 0.1 M  $[n\text{-Bu}_4\text{N}]\text{PF}_6$ .

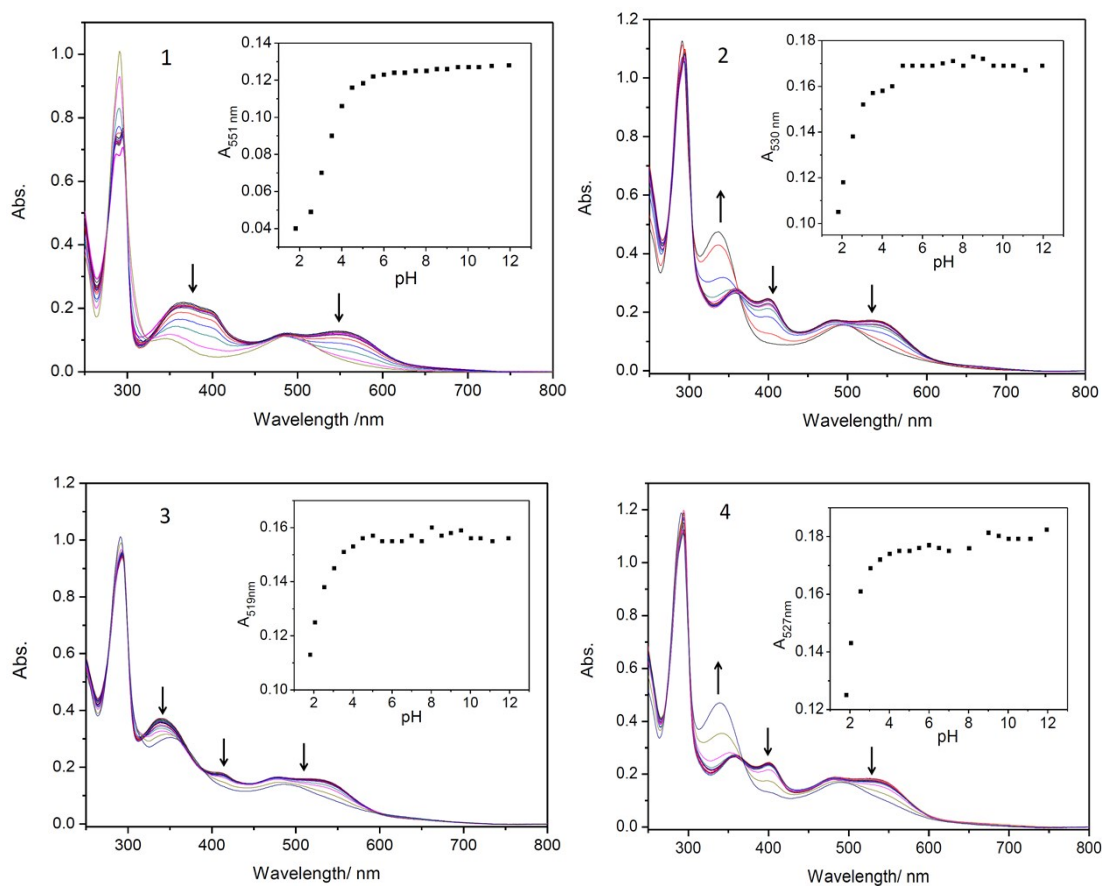

Fig. S19 Absorption spectral changes of complexes 1–4 (20  $\mu\text{M}$ ) after being incubated for 4 h in ethanol/Britton–Robinson buffer solutions (v/v=1:2, pH 11.95–1.82), respectively. Arrows show spectral changes upon decreasing pH. Inset: Changes of absorption intensity at different pHs.

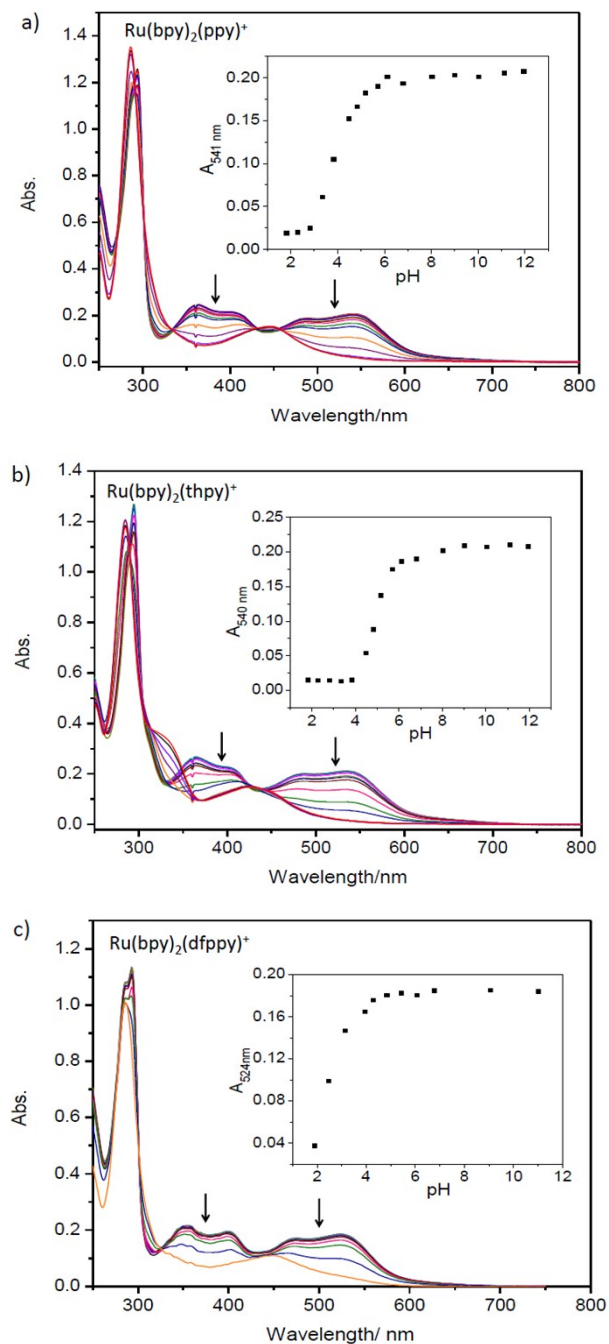

Fig. S20 Absorption spectral changes of complexes (20 μM) after being incubated for 4 h in CH<sub>3</sub>CN/ethanol/Britton-Robinson buffer solutions (v/v/v = 2:8:90), respectively. Arrows show spectral changes upon decreasing pH. Inset: Changes of absorption intensity at different pHs. (a) pH=11.95–1.82; (b) pH = 11.95–1.82 (c) pH=11.02–1.91.

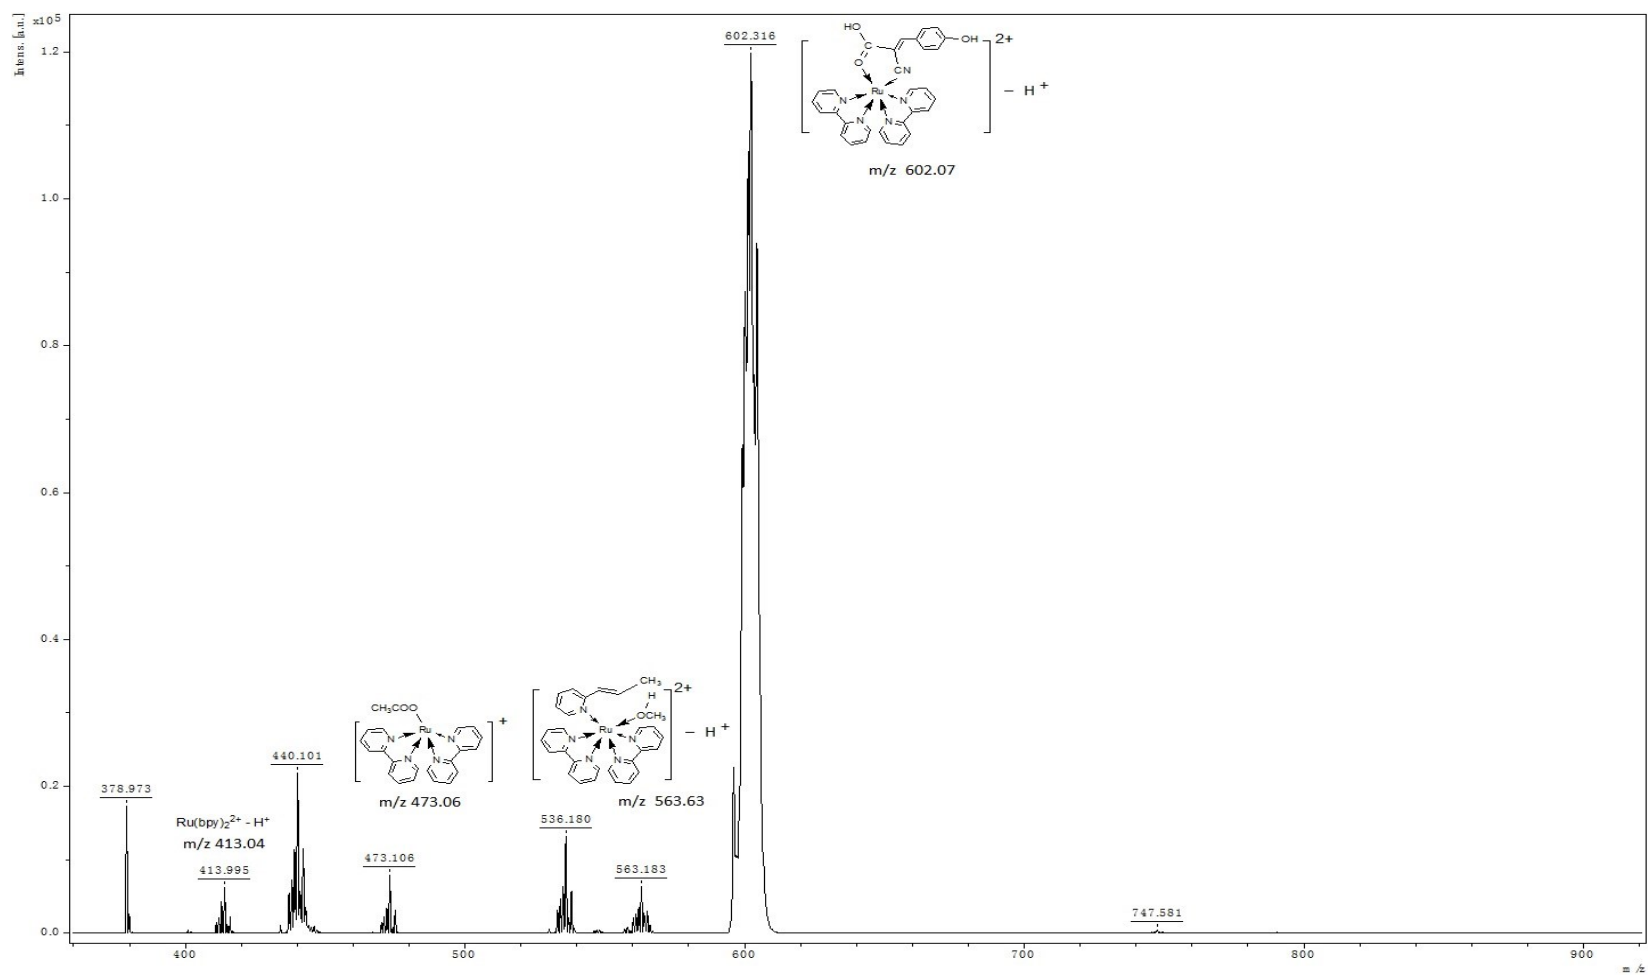

Fig. S21 MS spectrum of complex **1** incubated in  $\text{CH}_3\text{OH}/\text{HAc}/\text{H}_2\text{O}$  ( $v/v/v=1:1:1$ ) for 4 h.

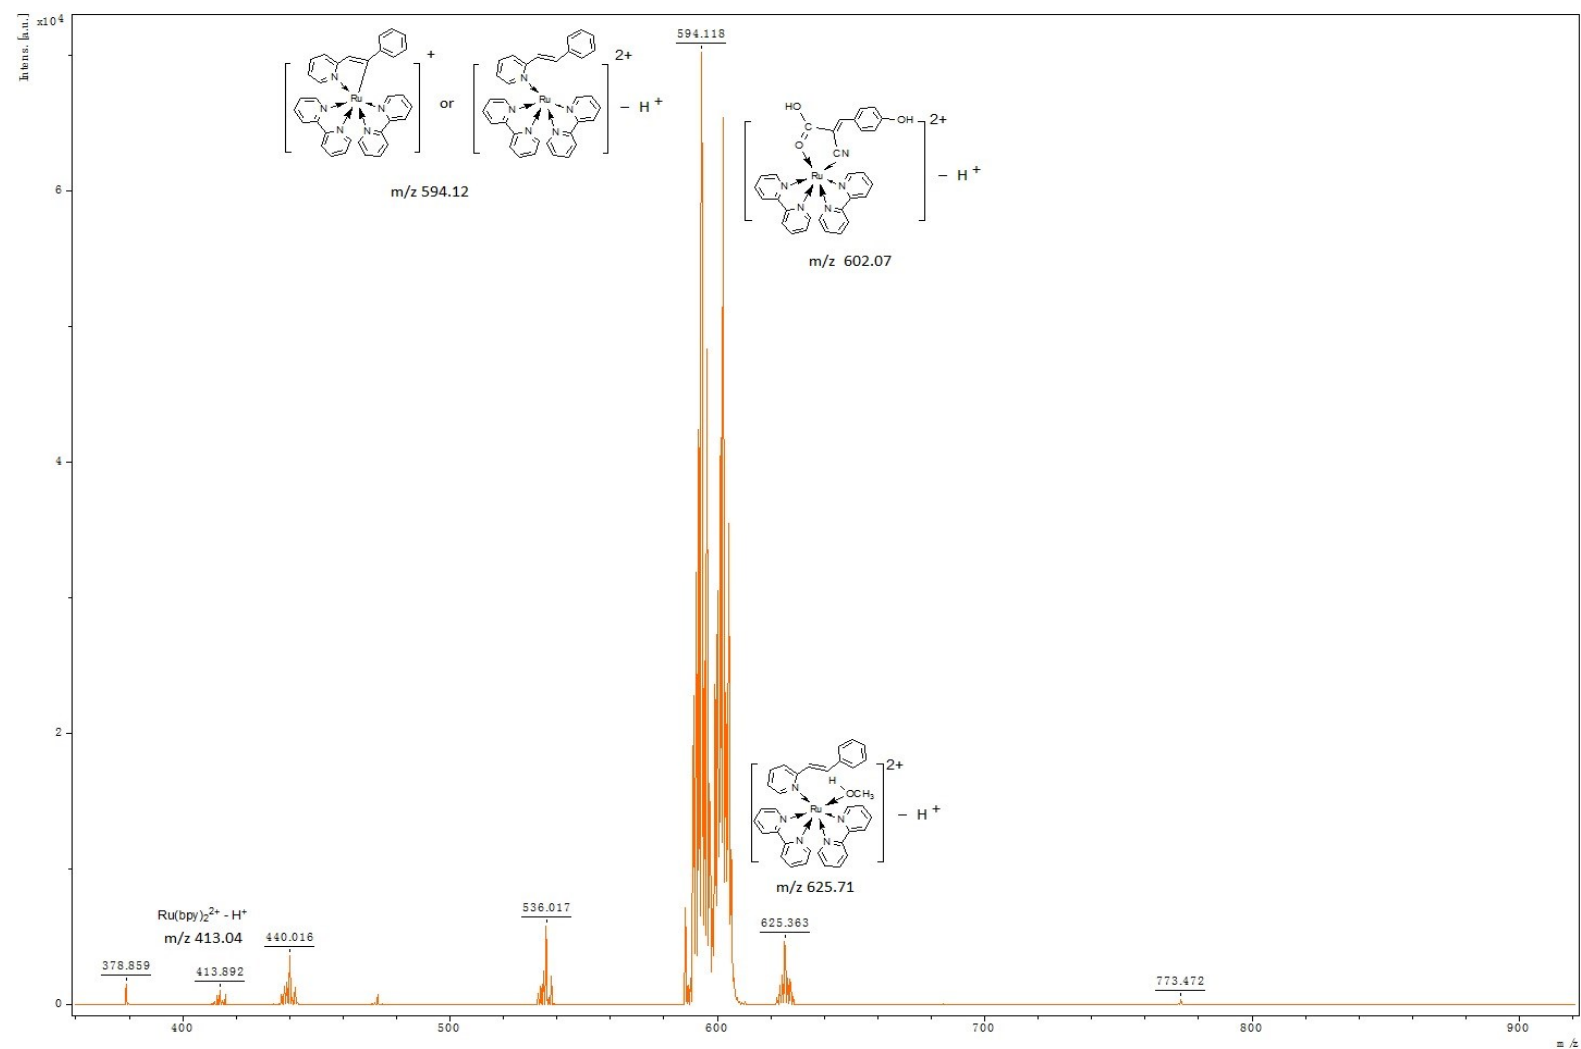

Fig. S22 MS spectrum of complex **2** incubated in CH<sub>3</sub>OH/HAc/H<sub>2</sub>O (v/v/v=1:1:1) for 4 h.

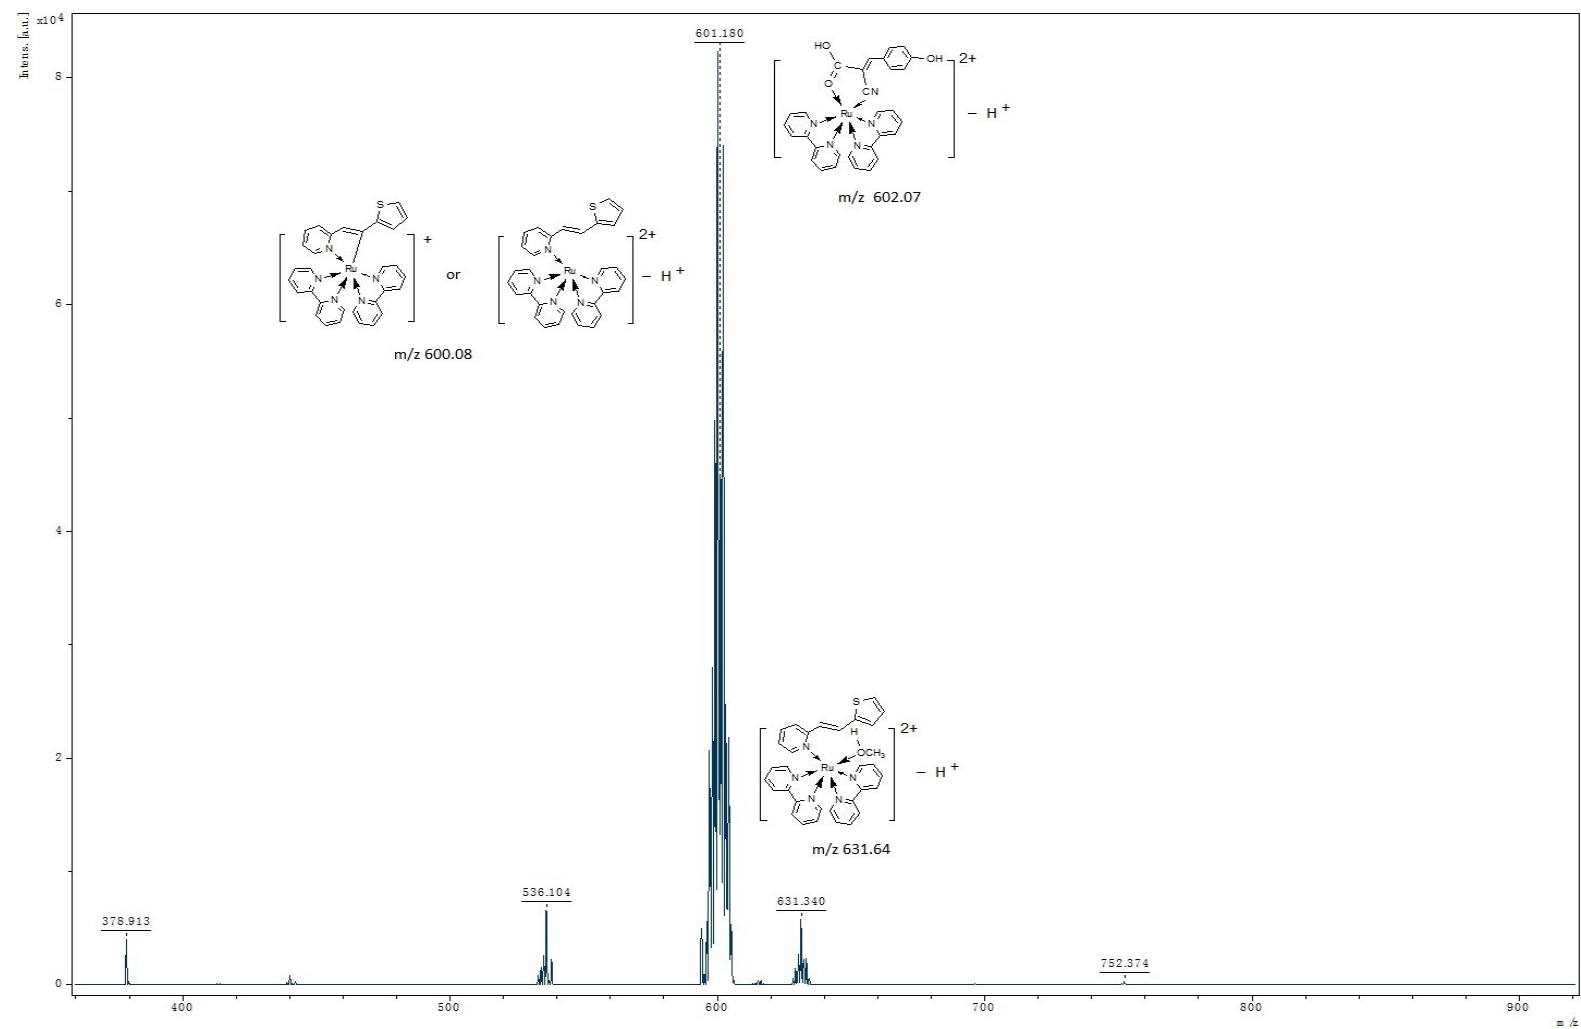

Fig. S23 MS spectrum of complex **3** incubated in CH<sub>3</sub>OH/HAc/H<sub>2</sub>O (v/v/v=1:1:1) for 4 h.



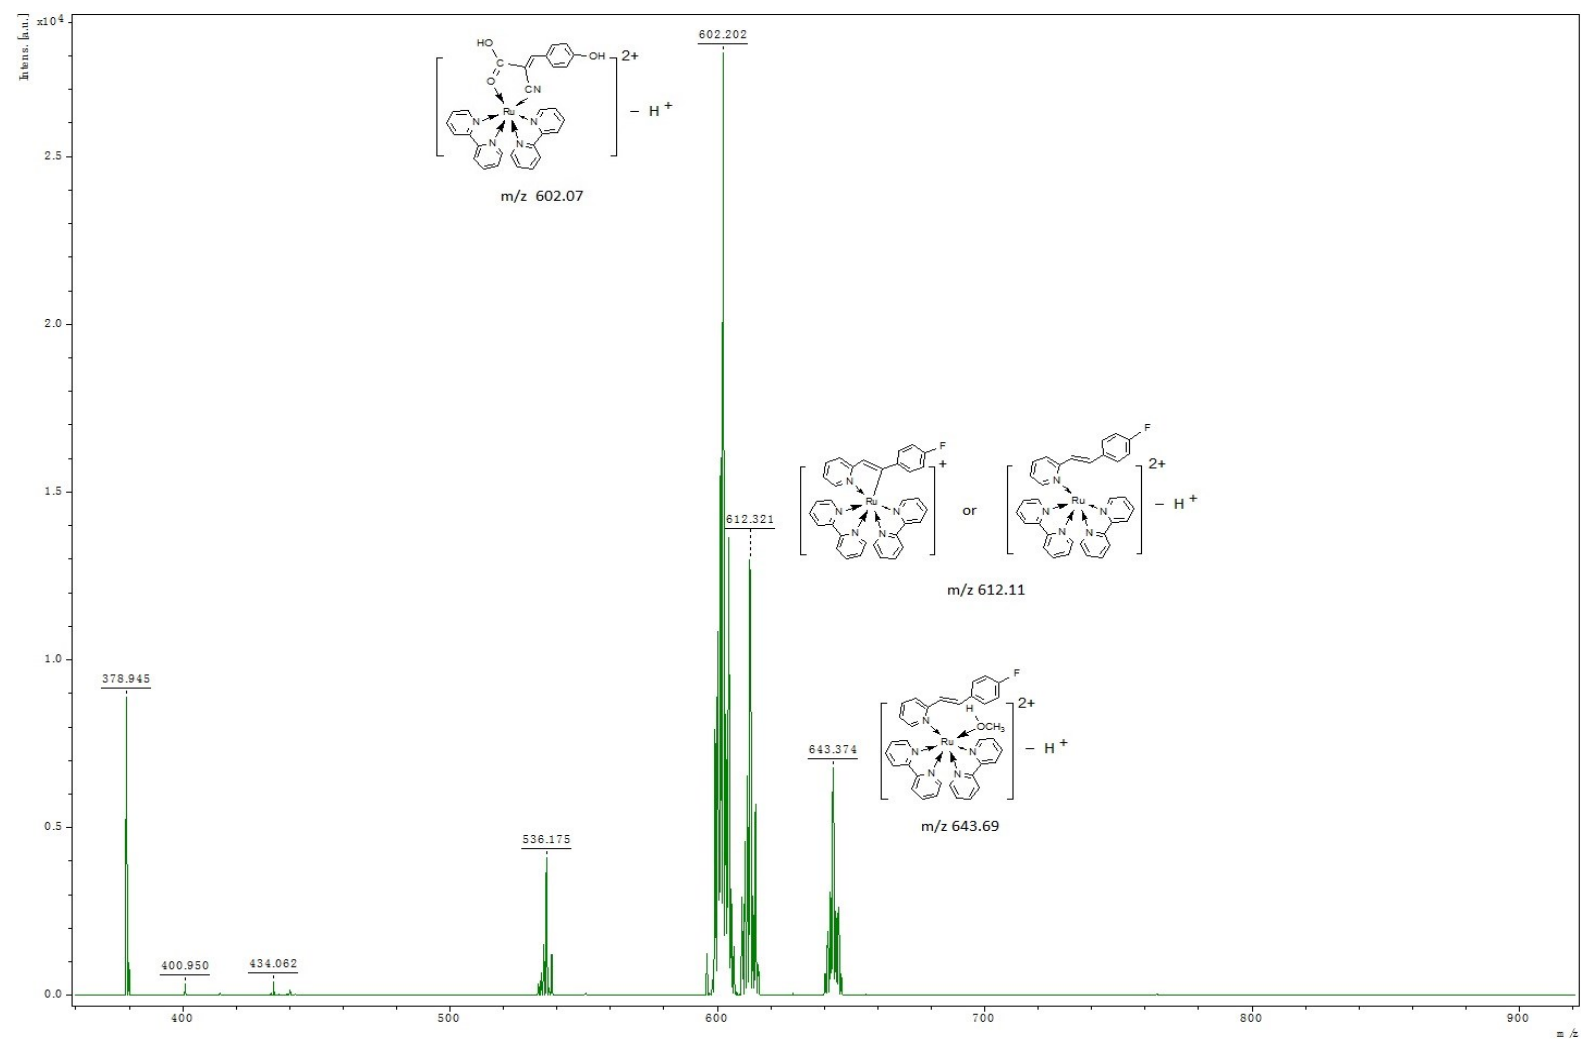

Fig. S24 MS spectrum of complex **4** incubated in CH<sub>3</sub>OH/HAc/H<sub>2</sub>O (v/v/v=1:1:1) for 4 h.

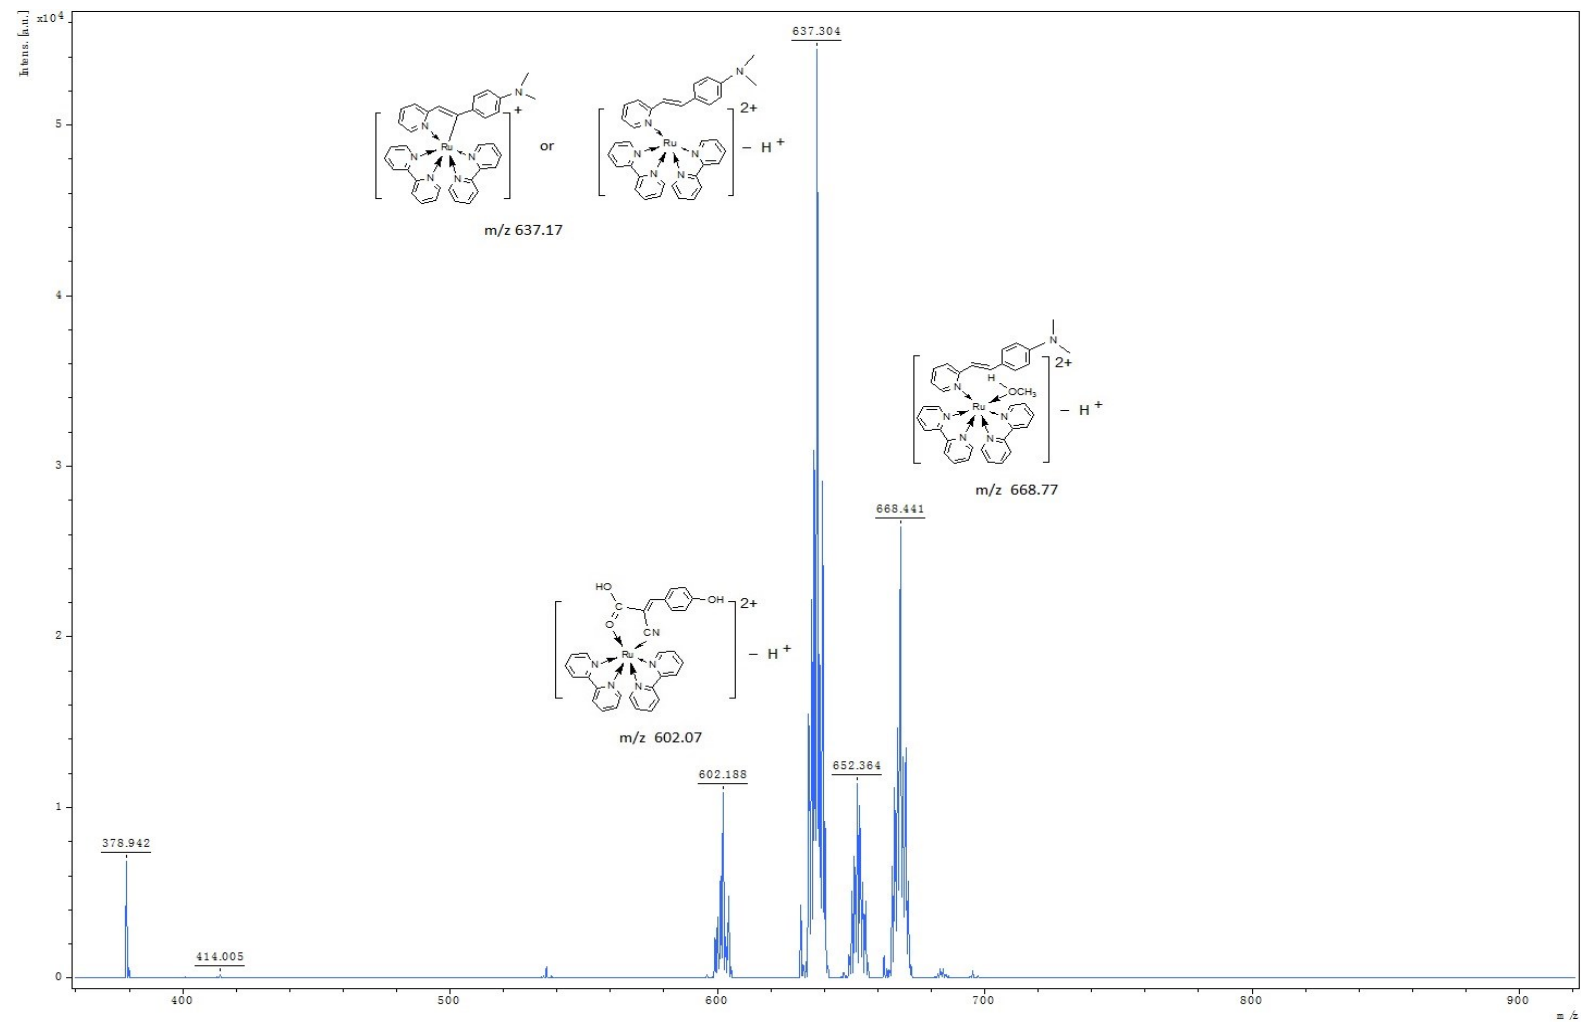

Fig. S25 MS spectrum of complex **5** incubated in CH<sub>3</sub>OH/HAc/H<sub>2</sub>O (v/v/v=1:1:1) for 4 h.

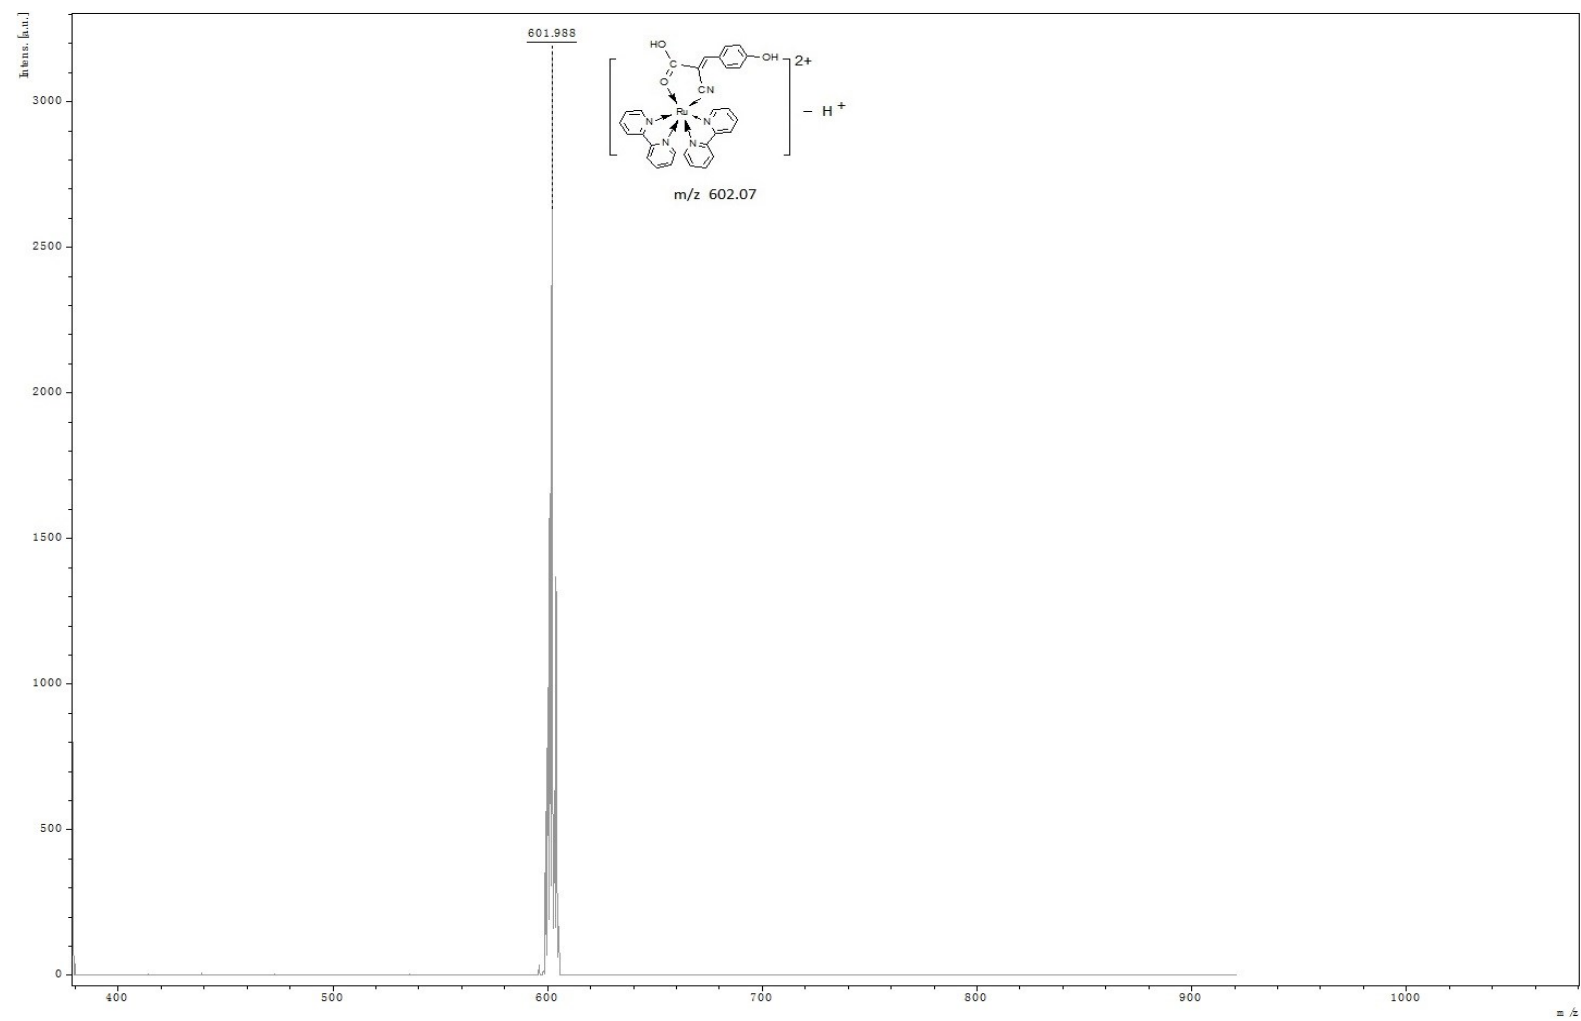

Fig. S26 MS spectrum of complex **1** incubated in CH<sub>3</sub>OH/HAc/H<sub>2</sub>O (v/v/v=1:1:1) for 20 h

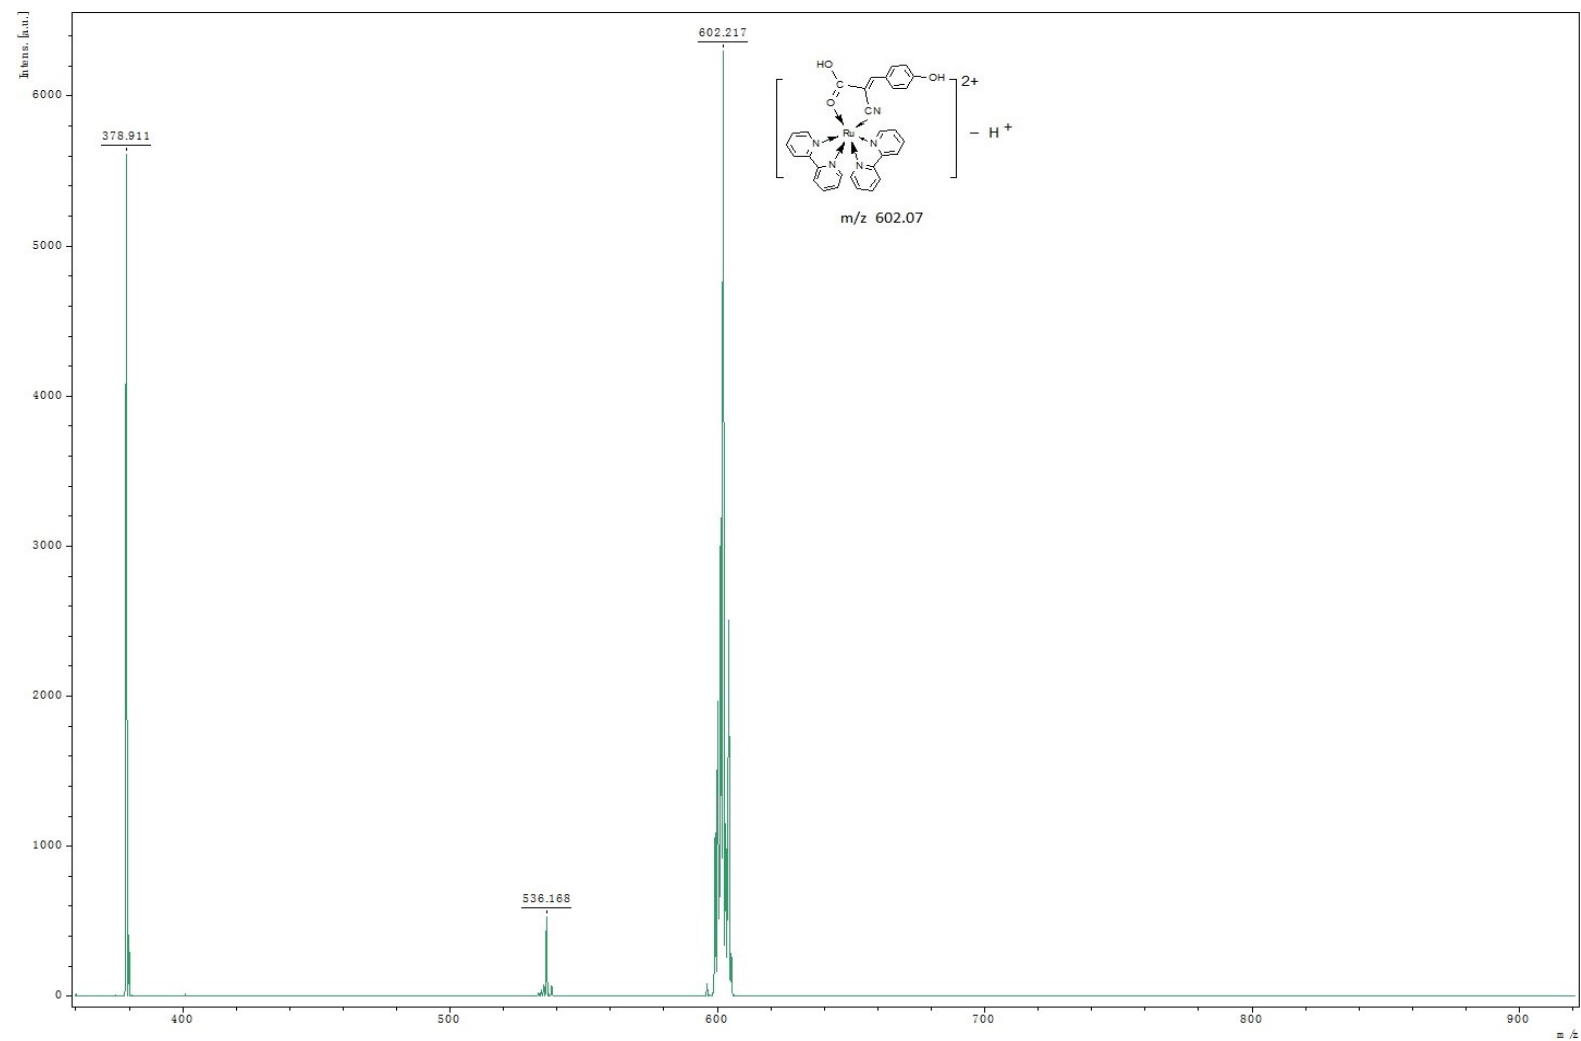

Fig. S27 MS spectrum of complex **2** incubated in CH<sub>3</sub>OH/HAc/H<sub>2</sub>O (v/v/v=1:1:1) for 20 h.

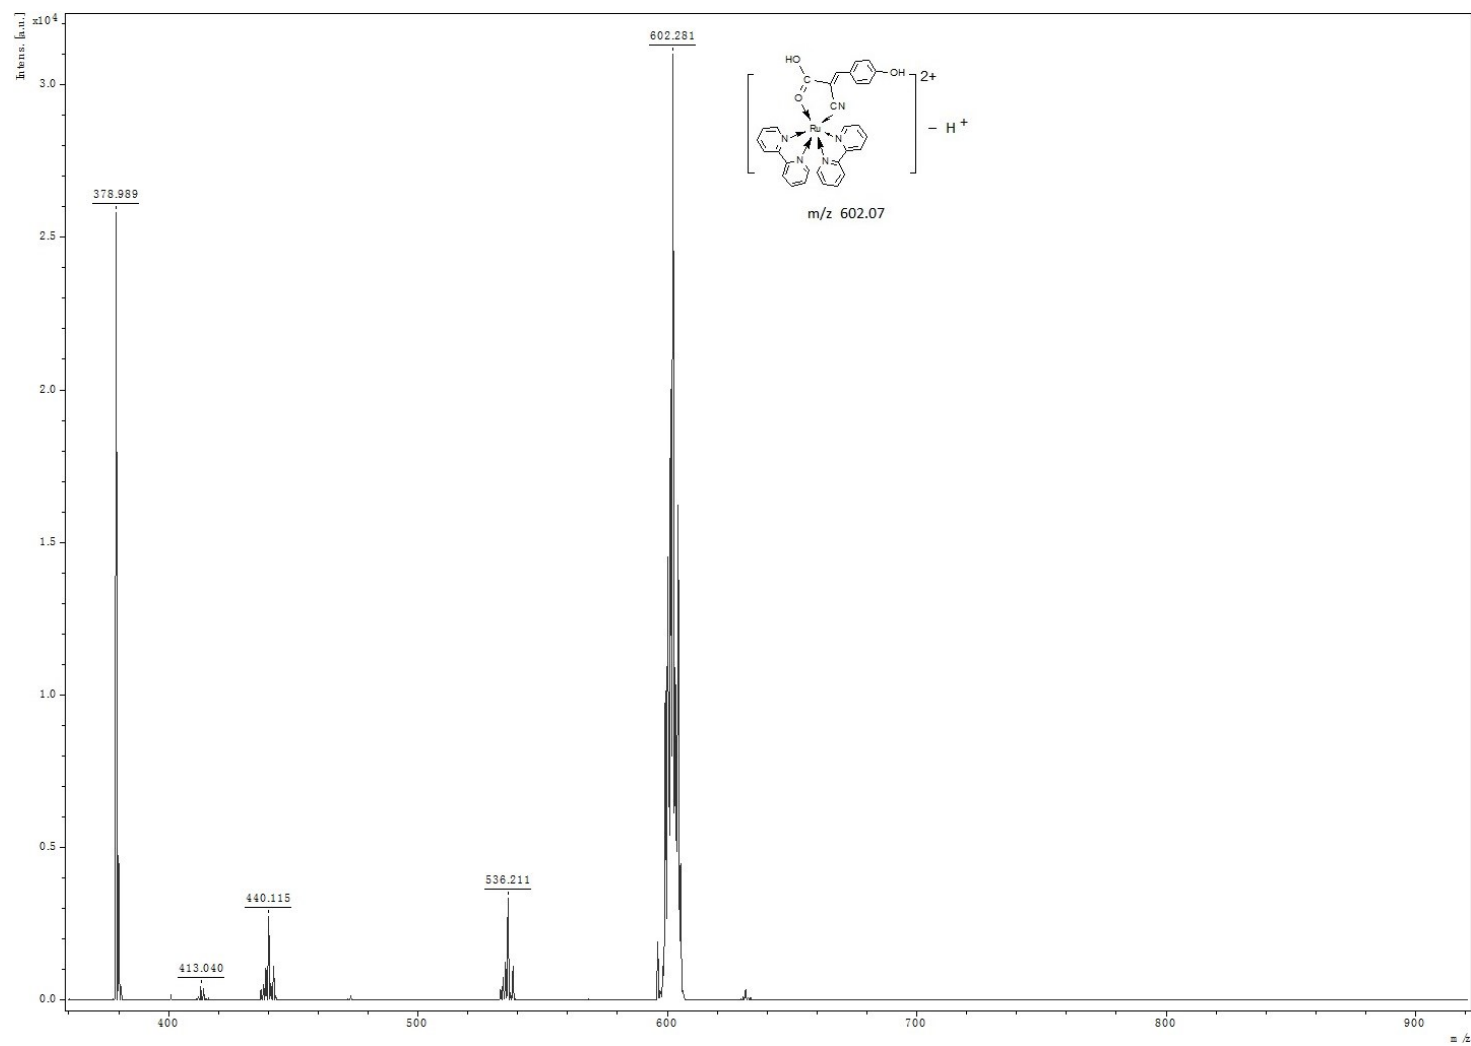

Fig. S28 MS spectrum of complex **3** incubated in CH<sub>3</sub>OH/HAc/H<sub>2</sub>O (v/v/v=1:1:1) for 20 h.

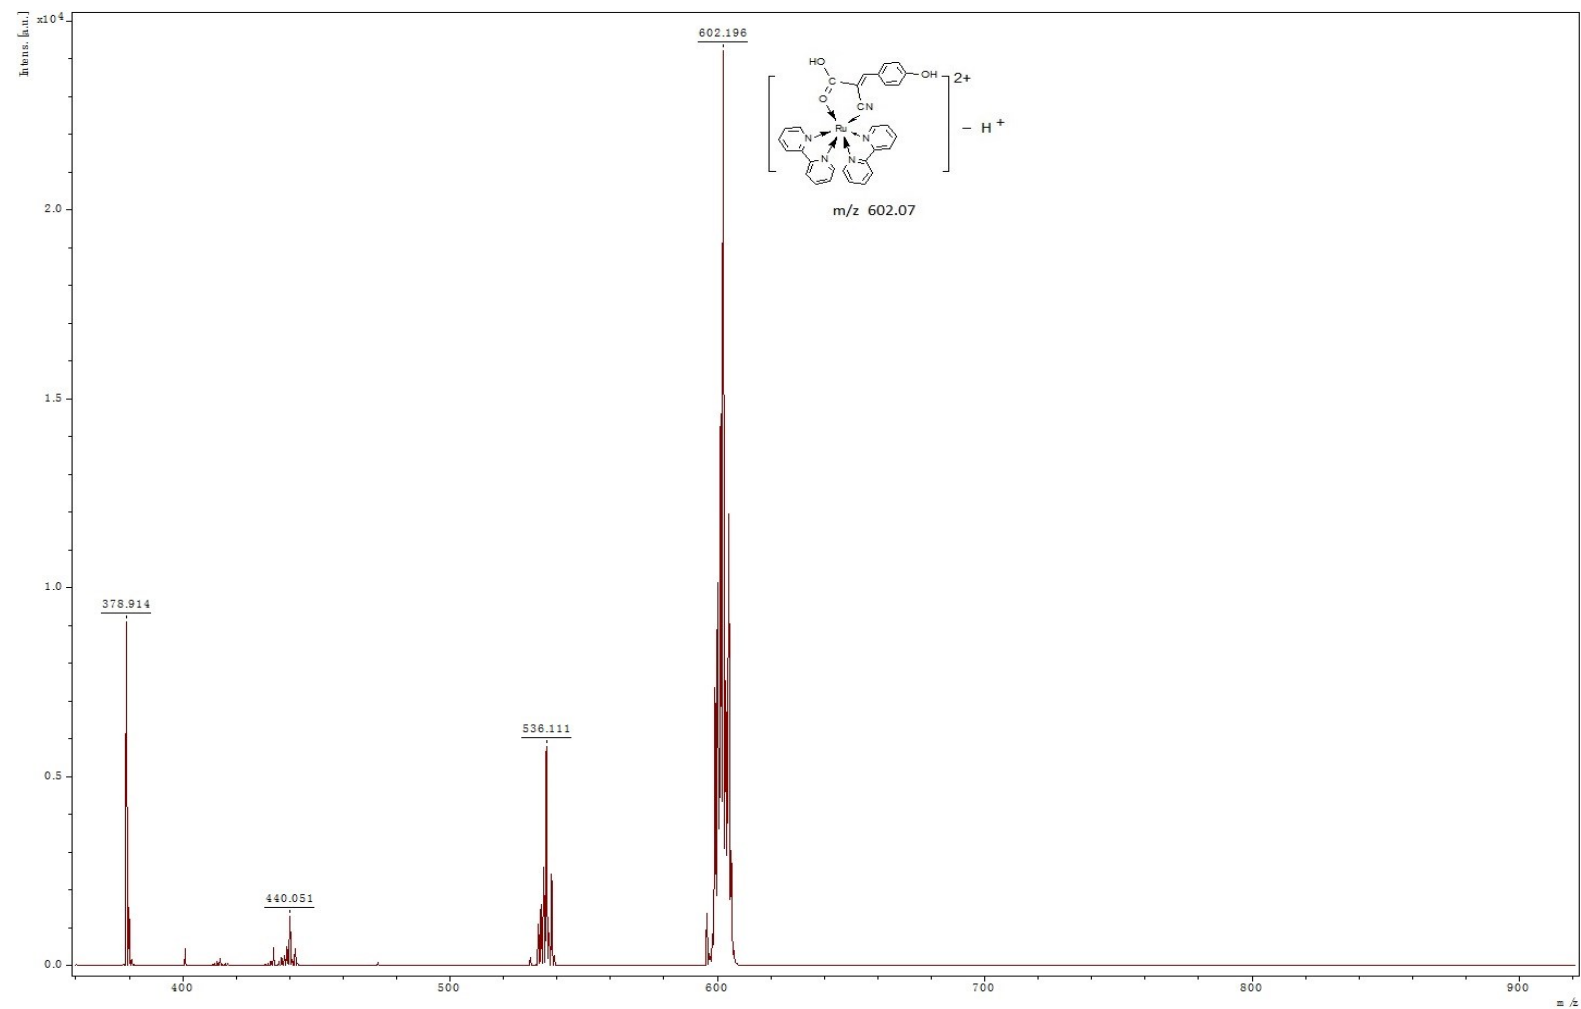

Fig. S29 MS spectrum of complex **4** incubated in CH<sub>3</sub>OH/HAc/H<sub>2</sub>O (v/v/v=1:1:1) for 20 h.

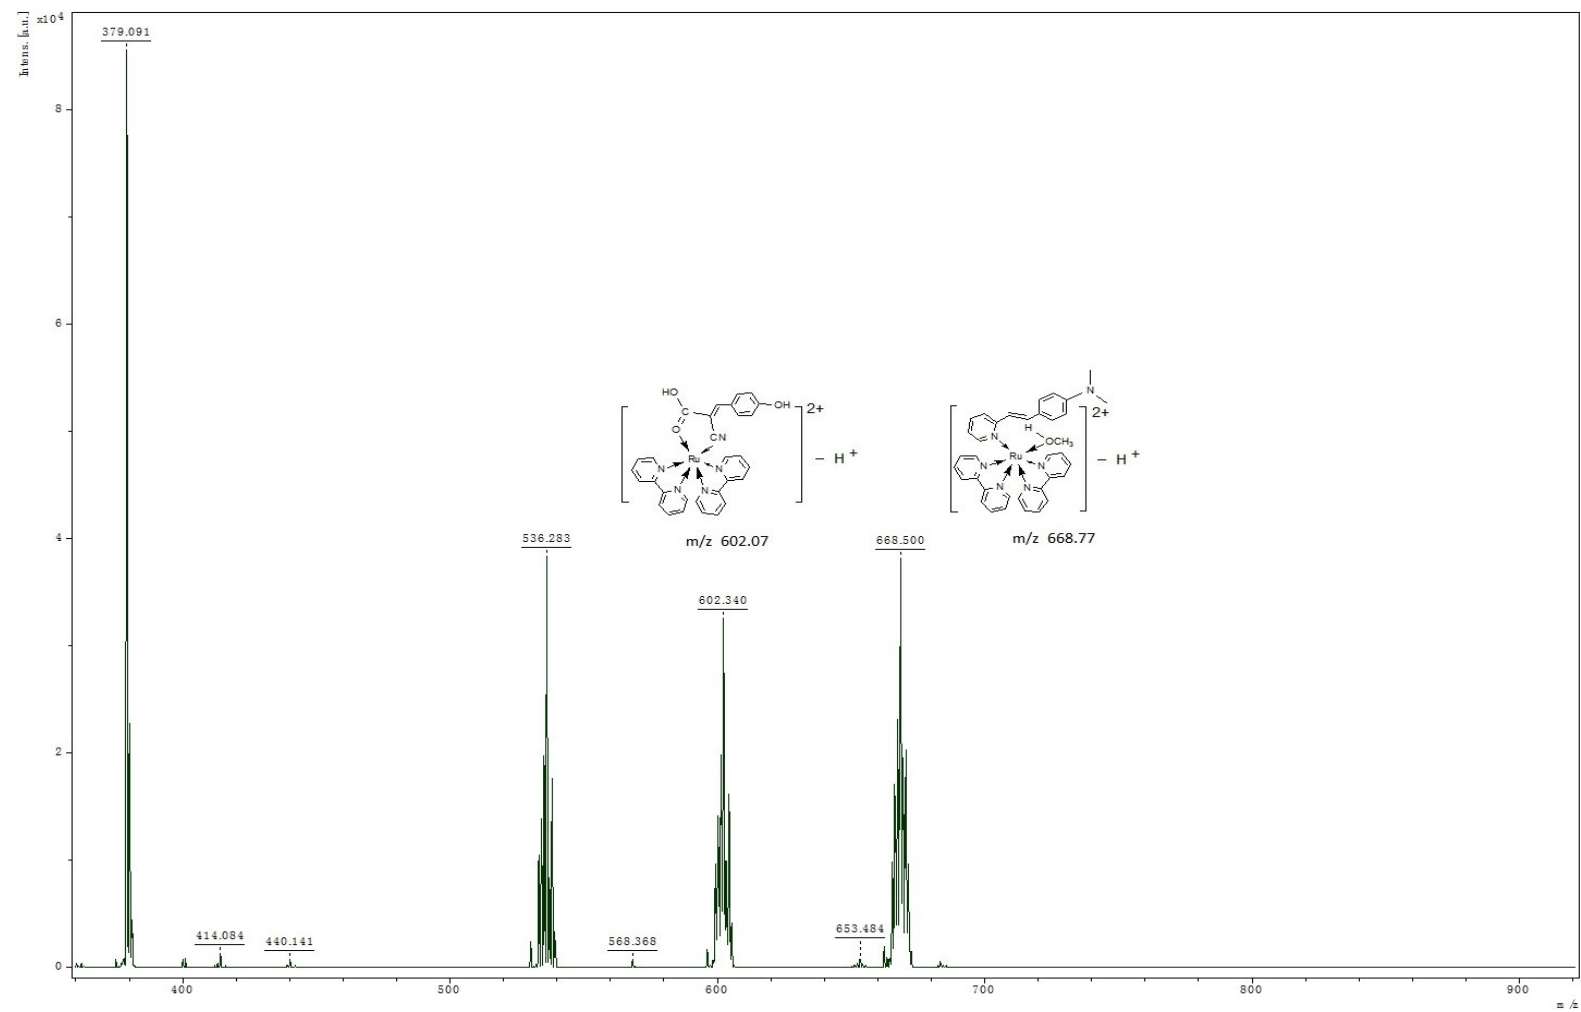

Fig. S30 MS spectrum of complex **5** incubated in CH<sub>3</sub>OH/HAc/H<sub>2</sub>O (v/v/v=1:1:1) for 20 h.

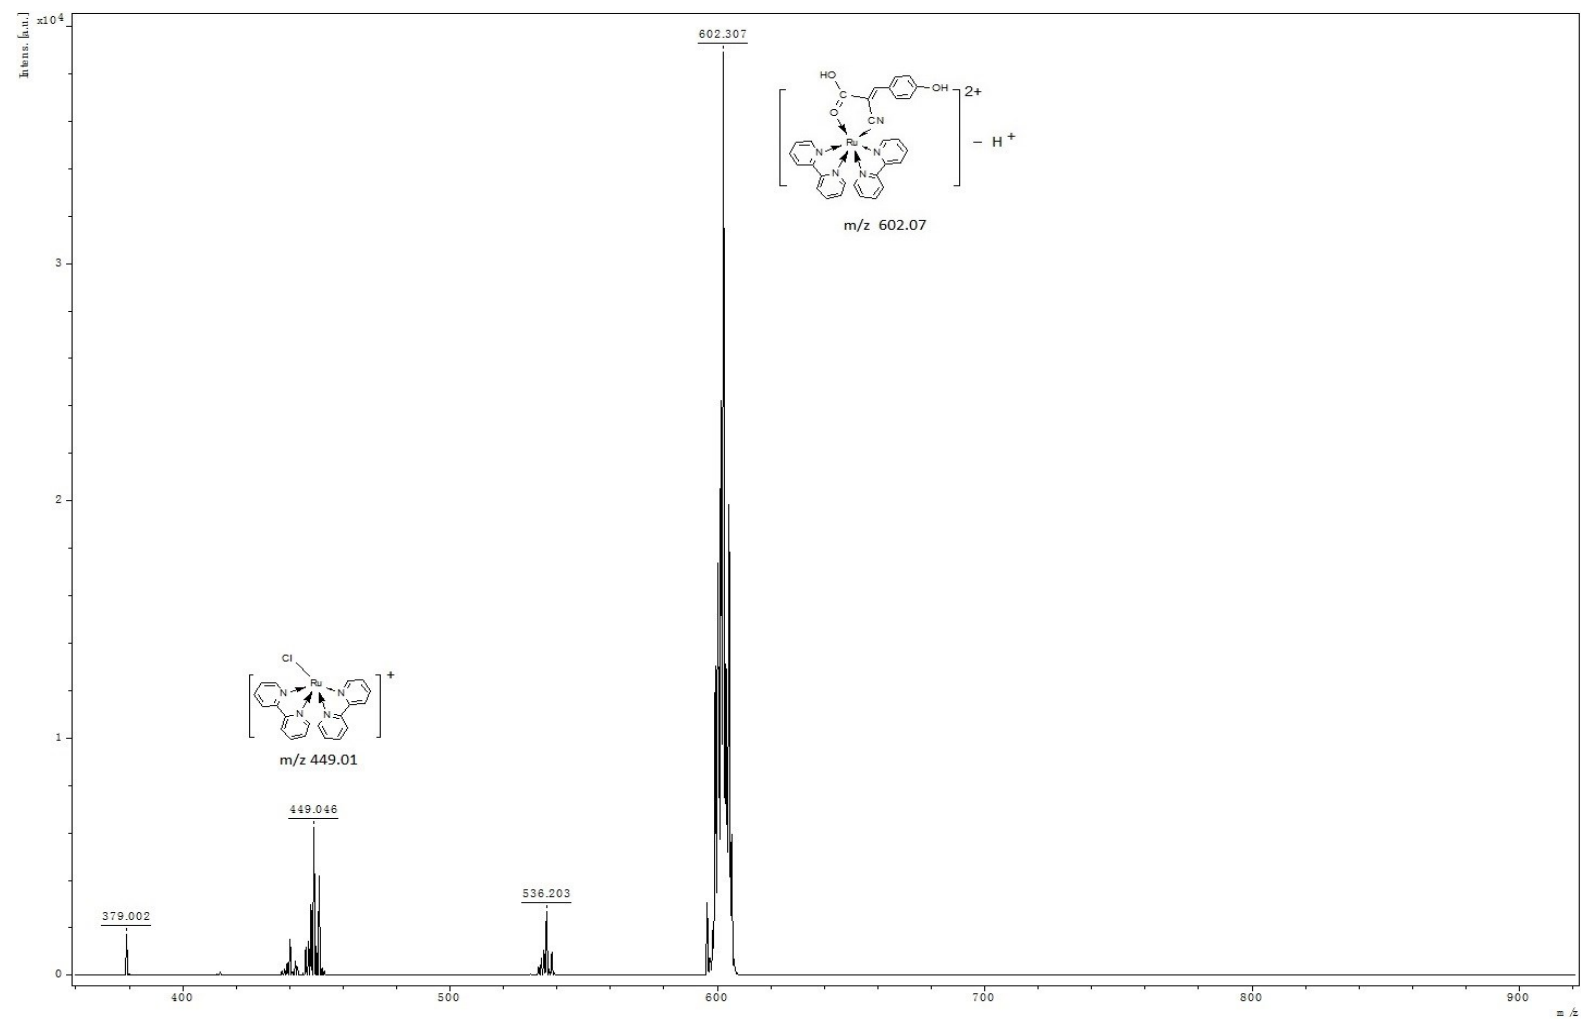

Fig. S31 MS spectrum of complex **1** incubated in CH<sub>3</sub>OH/HCl/H<sub>2</sub>O (v/v =1:1:1) for 20 h.



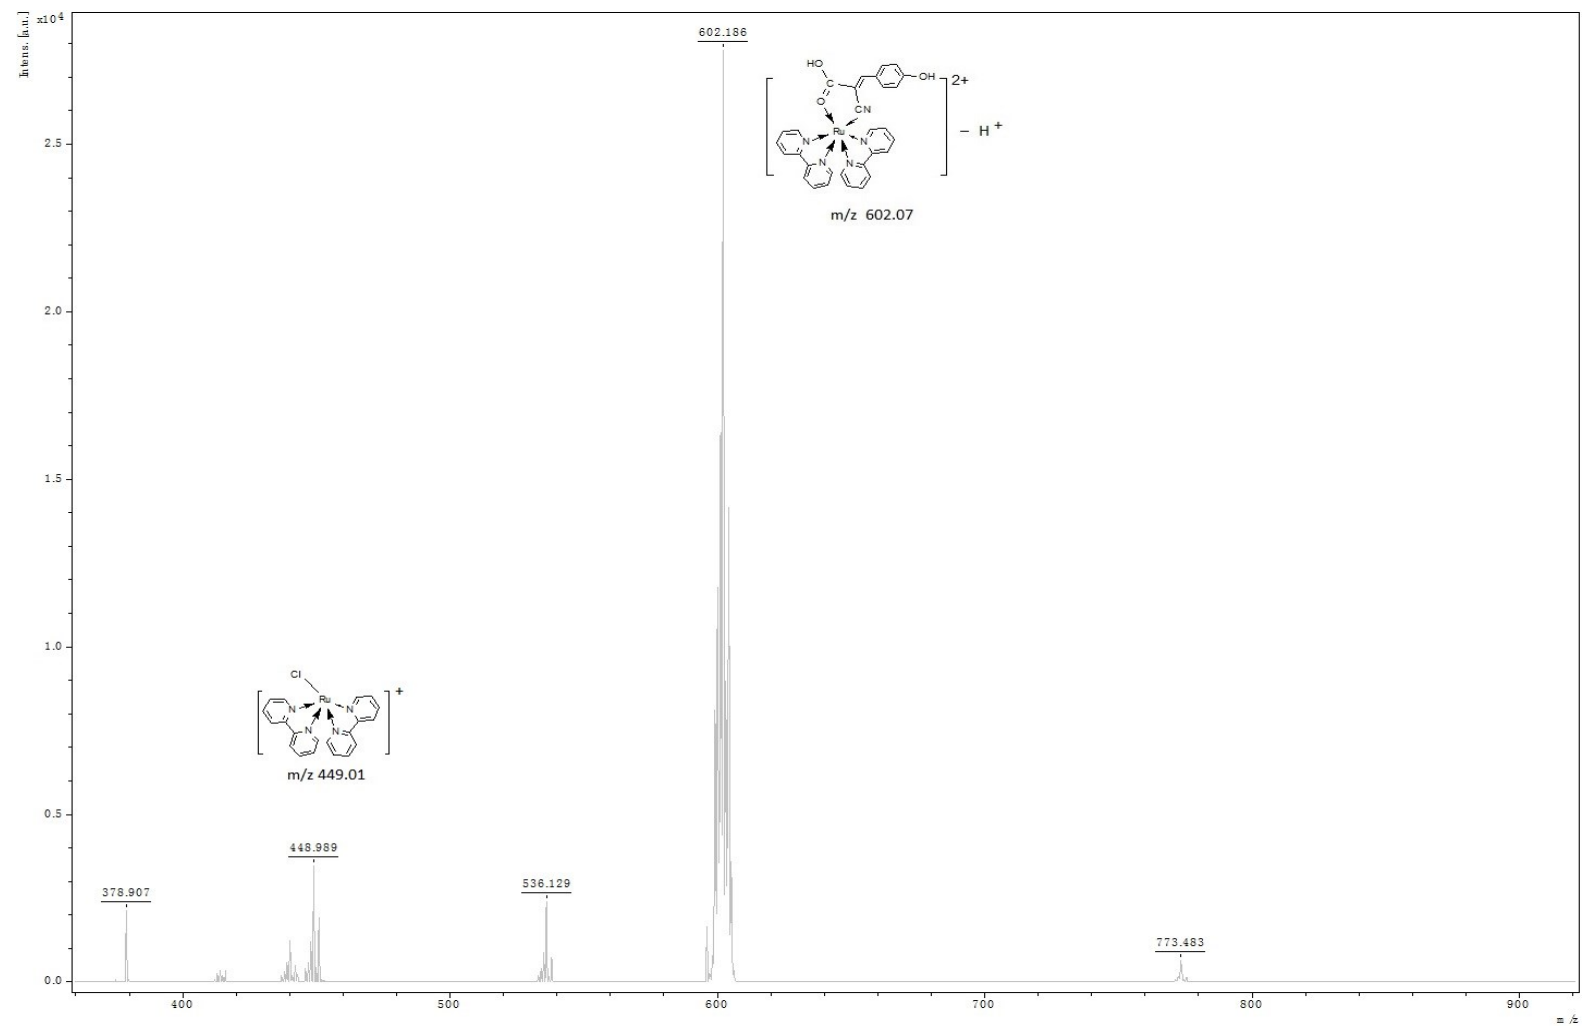

Fig. S32 MS spectrum of complex **2** incubated in  $\text{CH}_3\text{OH}/\text{HCl}/\text{H}_2\text{O}$  (v/v = 1:1:1) for 20 h

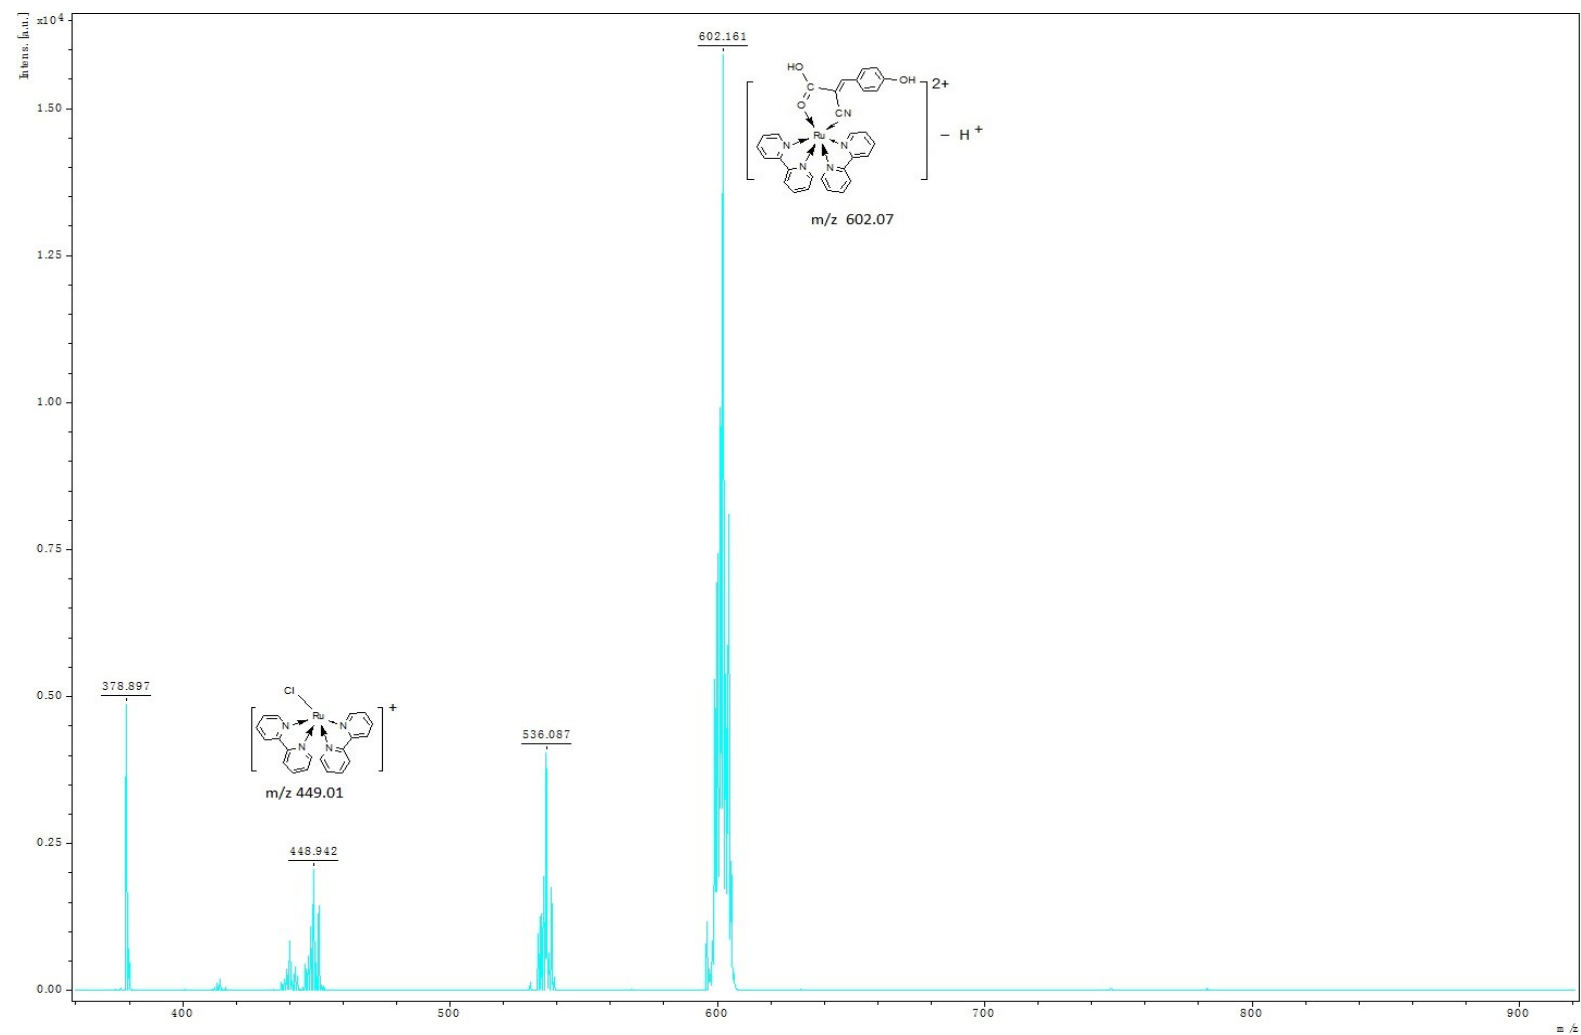

Fig. S33 MS spectrum of complex **3** incubated in CH<sub>3</sub>OH/HCl/H<sub>2</sub>O (v/v =1:1:1) for 20 h

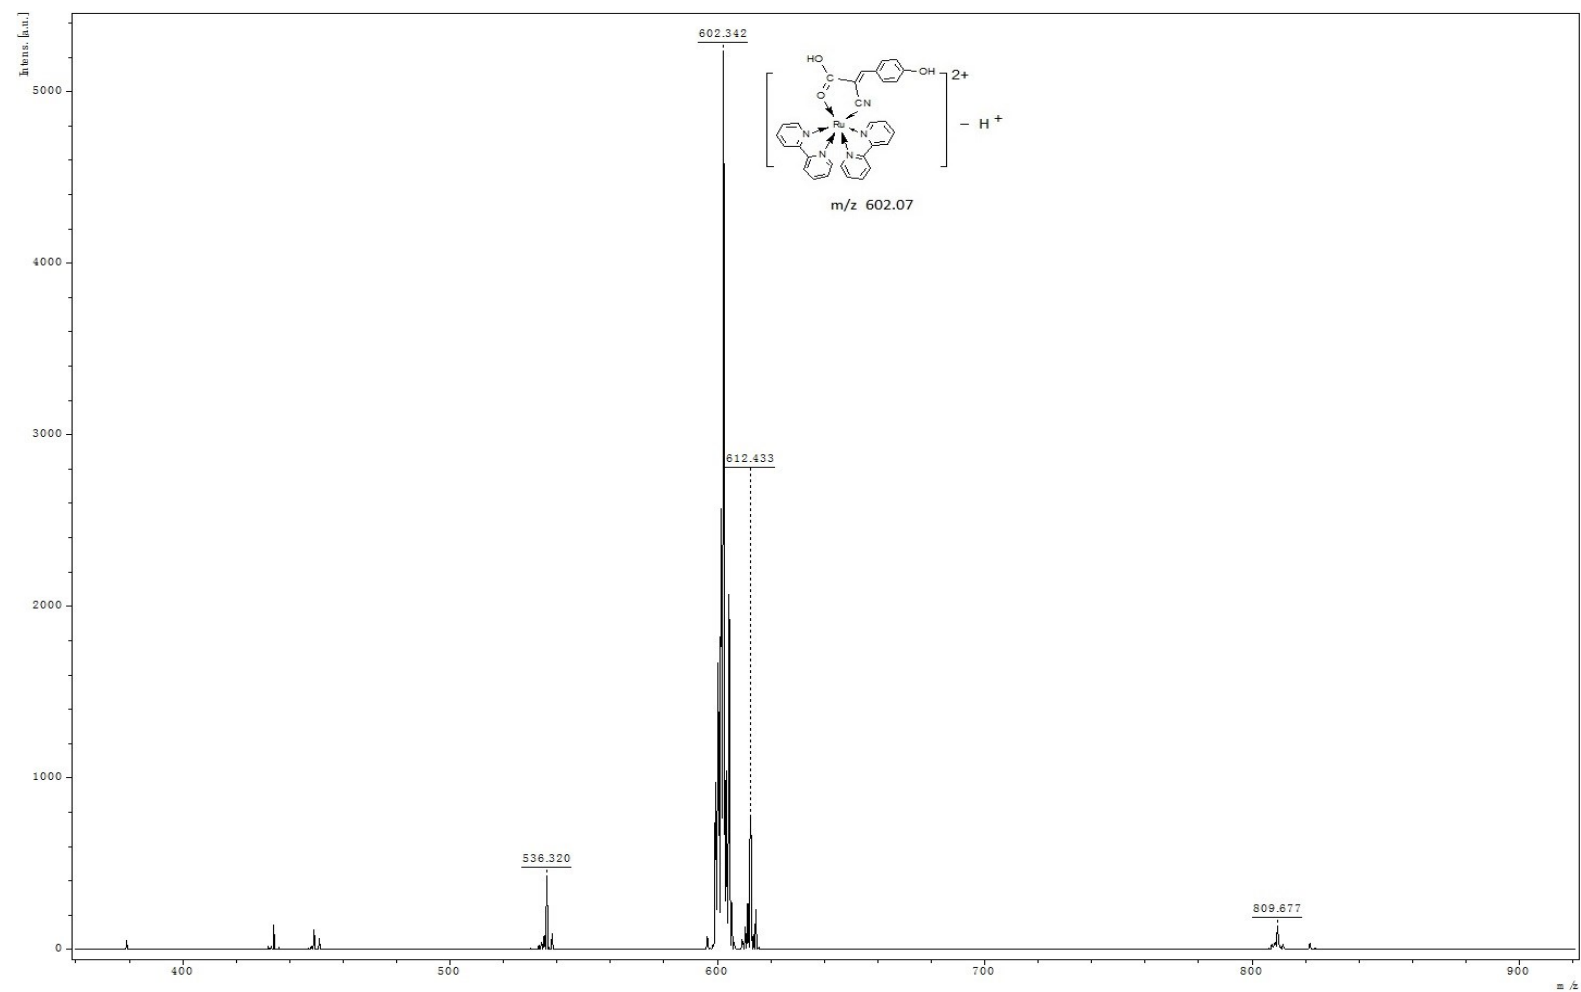

Fig. S34 MS spectrum of complex **4** incubated in CH<sub>3</sub>OH/HCl/H<sub>2</sub>O (v/v =1:1:1) for 20 h

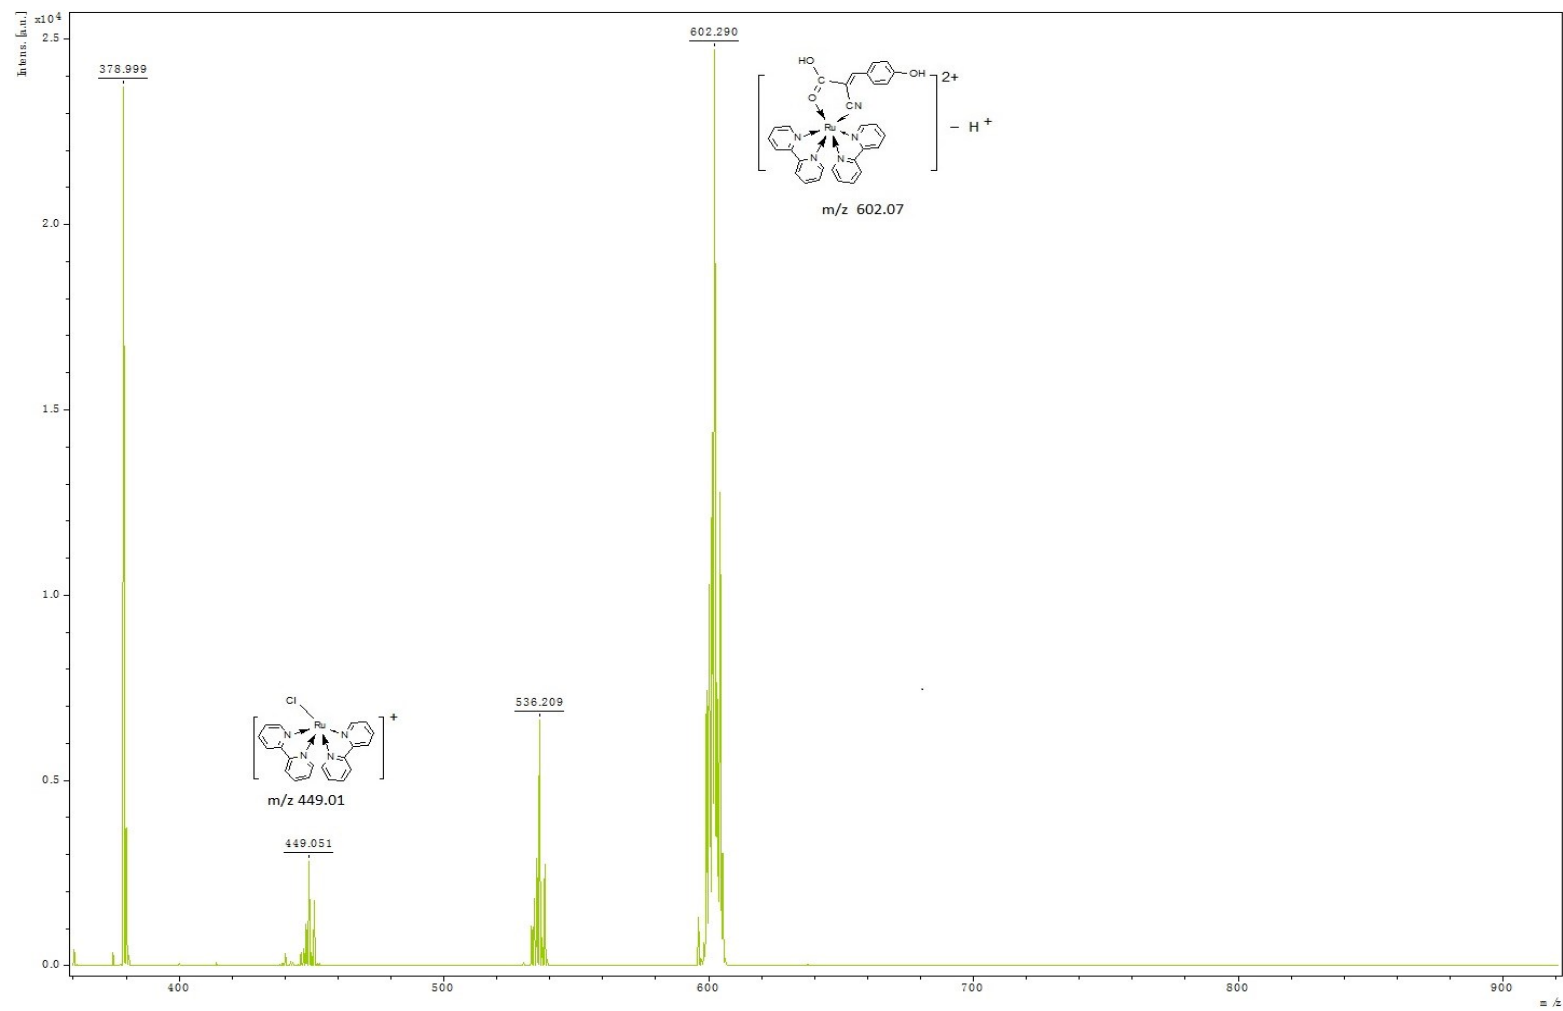

Fig. S35 MS spectrum of complex **5** incubated in CH<sub>3</sub>OH/HCl/H<sub>2</sub>O (v/v =1:1:1) for 20 h

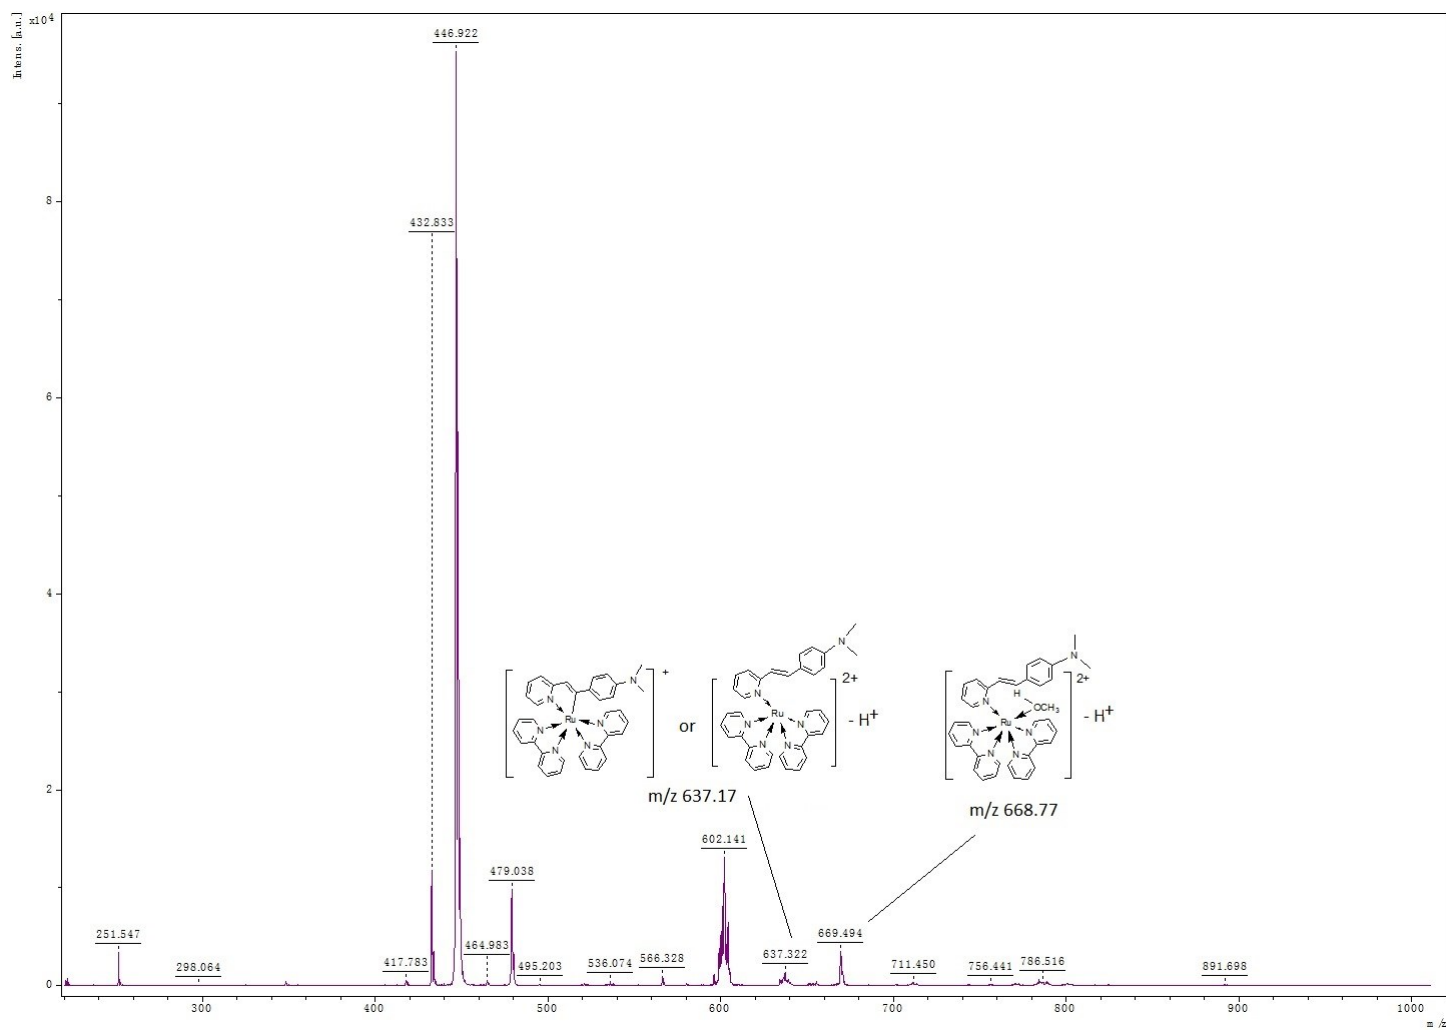

Fig. S36 MS spectrum of  $\text{Ru}(\text{bpy})_2\text{Cl}_2$  with ligand of complex **5** in  $\text{CH}_3\text{OH}$  treated with  $\text{AgBF}_4$  and then  $\text{NaOH}$ .
